# Supplementary material
Source: PubMed Central journal article supplement (PMC8345232)
Supplement: NIHMS1723110-supplement-Supplementary_Data.pdf [file NIHMS1723110-supplement-Supplementary_Data.pdf]

**Supplementary Table S1.** Characteristics of the study population.

| Characteristic                             | Institution |            |            | Total      |
|--------------------------------------------|-------------|------------|------------|------------|
|                                            | DF/BWCC     | URMC       | SCI        |            |
| Number of subjects                         | 109         | 73         | 123        | 305        |
| Men (n, %)                                 | 47 (43%)    | 44 (60%)   | 76 (62%)   | 167 (55%)  |
| Age, (median, IQR), years                  | 64 (58-71)  | 67 (59-72) | 69 (62-75) | 67 (59-73) |
| Race                                       |             |            |            |            |
| White                                      | 82 (75%)    | 65 (89%)   | 93 (76%)   | 240 (79%)  |
| Black                                      | 1 (1%)      | 3 (4%)     | 1 (1%)     | 5 (2%)     |
| Asian                                      | 1 (1%)      | 2 (3%)     | 23 (19%)   | 26 (8%)    |
| Other/Unknown                              | 25 (23%)    | 3 (4%)     | 6 (4%)     | 34 (11%)   |
| pT stage (n, %)                            |             |            |            |            |
| T1-T2                                      | 8 (7%)      | 4 (5%)     | 39 (32%)   | 51 (17%)   |
| T3-T4                                      | 101 (93%)   | 69 (95%)   | 83 (67%)   | 253 (83%)  |
| Tx                                         | 0           | 0          | 1 (1%)     | 1 (<1%)    |
| pN stage (n, %)                            |             |            |            |            |
| N0                                         | 34 (31%)    | 18 (25%)   | 42 (34%)   | 94 (31%)   |
| N1                                         | 75 (69%)    | 55 (75%)   | 81 (66%)   | 211 (69%)  |
| Tumor grade (n, %)                         |             |            |            |            |
| Well/Moderately differentiated             | 56 (51%)    | 39 (53%)   | 82 (67%)   | 177 (58%)  |
| Poorly differentiated/<br>Undifferentiated | 51 (47%)    | 32 (44%)   | 38 (31%)   | 121 (40%)  |
| Unknown                                    | 2 (2%)      | 2 (3%)     | 3 (2%)     | 7 (2%)     |
| Lymphovascular invasion (n, %)             |             |            |            |            |
| Negative                                   | 48 (44%)    | 25 (34%)   | 60 (49%)   | 133 (44%)  |
| Positive                                   | 52 (48%)    | 47 (64%)   | 42 (34%)   | 141 (46%)  |
| Unknown                                    | 9 (8%)      | 1 (1%)     | 21 (17%)   | 31 (10%)   |
| Resection margin status (n, %)             |             |            |            |            |
| R0                                         | 42 (38%)    | 40 (55%)   | 69 (56%)   | 151 (50%)  |
| R1                                         | 65 (60%)    | 33 (45%)   | 51 (41%)   | 149 (49%)  |
| R2                                         | 2 (2%)      | 0          | 2 (2%)     | 4 (1%)     |
| Rx (not evaluable)                         | 0           | 0          | 1 (1%)     | 1 (<1%)    |
| Adjuvant systemic chemotherapy (n, %)      |             |            |            |            |
| No                                         | 29 (26%)    | 20 (27.5%) | 37 (30%)   | 86 (28%)   |
| Yes                                        | 76 (70%)    | 50 (68.5%) | 67 (54.5%) | 193 (63%)  |
| Unknown                                    | 4 (4%)      | 3 (4%)     | 19 (15.5%) | 26 (9%)    |
| Adjuvant radiation therapy (n, %)          |             |            |            |            |
| No                                         | 45 (41%)    | 43 (59%)   | 68 (55%)   | 156 (51%)  |
| Yes                                        | 60 (55%)    | 27 (37%)   | 36 (29%)   | 123 (40%)  |
| Unknown                                    | 4 (4%)      | 3 (4%)     | 19 (16%)   | 26 (9%)    |

Abbreviations: DF/BWCC: Dana-Farber/Brigham and Women's Cancer Center; SCI: Stanford Cancer Institute; URMC: University of Rochester Medical Center

**Supplementary Table S2.** List of antibodies and fluorophores used in the multiplex immunofluorescence staining procedures.

| Panel      | Marker | Clone        | Manufacturer,<br>catalog number                     | Antibody<br>dilution | Fluorophore | Fluorophore<br>dilution | Antigen retrieval<br>before the primary<br>antibody |
|------------|--------|--------------|-----------------------------------------------------|----------------------|-------------|-------------------------|-----------------------------------------------------|
| Myeloid    | CD15   | Carb-3       | DAKO, M3631                                         | 1:200                | Opal 520    | 1:100                   | Tris-EDTA                                           |
| Myeloid    | CD14   | SP192        | Abcam, ab183322                                     | 1:300                | Opal 570    | 1:300                   | ER1                                                 |
| Myeloid    | ARG1   | EPR6672      | Abcam, ab133543                                     | 1:500                | Opal 690    | 1:150                   | ER1                                                 |
| Myeloid    | HLA-DR | TAL1B5       | Santa Cruz, sc-53319                                | 1:1000               | Opal 540    | 1:200                   | ER1                                                 |
| Myeloid    | CD33   | PWS44        | Leica Biosystems,<br>NCL-L-CD33                     | 1:75                 | Opal 650    | 1:400                   | ER1                                                 |
| Myeloid    | CK     | AE1/AE3; C11 | DAKO, M3515;<br>Cell Signaling<br>Technology, #4545 | 1:50; 1:500          | Opal 620    | 1:500                   | ER1                                                 |
| Macrophage | IRF5   | EPR17067     | Abcam, ab181553                                     | 1:4000               | Opal 650    | 1:300                   | Tris-EDTA                                           |
| Macrophage | CD163  | 10D6         | Leica Biosystems,<br>2021-08                        | 1:400                | Opal 570    | 1:300                   | ER1                                                 |
| Macrophage | CD68   | PG-M1        | DAKO, M0876                                         | 1:25                 | Opal 520    | 1:100                   | ER1                                                 |
| Macrophage | CD86   | E2G8P        | Cell Signaling<br>Technology, #91882                | 1:50                 | Opal 540    | 1:200                   | ER2                                                 |
| Macrophage | MRC1   | E2L9N        | Cell Signaling<br>Technology, #91992                | 1:600                | Opal 690    | 1:150                   | ER1                                                 |
| Macrophage | CK     | See above    | See above                                           | 1:50; 1:500          | Opal 620    | 1:500                   | ER1                                                 |

Abbreviations: ER1/2: BOND Epitope Retrieval Solution 1/2 (Leica Biosystems, Buffalo, IL, USA)

**Supplementary Table S3.** List of reagents and equipment used in multiplex immunofluorescence.

| <b>Reagent</b>                    | <b>Manufacturer, catalog number</b>                        |
|-----------------------------------|------------------------------------------------------------|
| Xylene                            | Fisher Scientific (Pittsburgh, PA, USA), X3P1GAL           |
| Ethanol                           | Fisher Scientific, HC-800-1GAL                             |
| Tris-EDTA (pH 9.0)                | DAKO (Copenhagen, Denmark), S1699                          |
| BOND Epitope Retrieval Solution 1 | Leica Biosystems (Buffalo, IL, USA), AR9961                |
| BOND Epitope Retrieval Solution 2 | Leica Biosystems, AR9640                                   |
| Protein Block, Serum-Free         | DAKO, X0909                                                |
| Opal polymer HRP Ms + Rb          | Akoya Biosciences (Hopkinton, MA, USA), ARH1001EA          |
| Spectral DAPI                     | Akoya Biosciences, FP1490                                  |
| ProLong Diamond Antifade Mountant | Fisher Scientific, P36970                                  |
| FF Cover Glass                    | Fisher Scientific, 125485M                                 |
| <b>Equipment</b>                  |                                                            |
| 2100-Retriever                    | Electron Microscopy Sciences (Hatfield, PA, USA), 62700-10 |
| Leica BOND RX Research Stainer    | Leica Biosystems                                           |

**Supplementary Table S4.** Myeloid immune cell densities within intraepithelial, stromal, and whole tissue areas.

| Myeloid immune cell subset                                                | Myeloid immune cell densities (cells/mm <sup>2</sup> ) |                             |                                 |
|---------------------------------------------------------------------------|--------------------------------------------------------|-----------------------------|---------------------------------|
|                                                                           | Intraepithelial, median (IQR)                          | Stromal, median (IQR)       | Whole tissue area, median (IQR) |
| <b>CD15<sup>+</sup> cells</b>                                             | <b>83.2 (19.1-210.9)</b>                               | <b>100.2 (28.4-422.8)</b>   | <b>93.9 (27.6-353.6)</b>        |
| <b>CD15<sup>+</sup>ARG1<sup>+</sup></b>                                   | 46.3 (7.4-139.2)                                       | 64.3 (15.7-271.1)           | 62.6 (15.9-222.3)               |
| CD15 <sup>+</sup> ARG1 <sup>+</sup> CD33 <sup>+</sup>                     | 0.6 (0.0-12.3)                                         | 1.8 (0.0-8.6)               | 2.0 (0.0-9.7)                   |
| CD15 <sup>+</sup> ARG1 <sup>+</sup> CD33 <sup>-</sup>                     | 35.2 (6.1-124.3)                                       | 58.8 (13.7-260.0)           | 54.0 (14.0-212.7)               |
| <b>CD15<sup>+</sup>ARG1<sup>-</sup></b>                                   | 18.2 (5.0-62.9)                                        | 28.5 (8.2-93.2)             | 24.8 (8.3-81.3)                 |
| CD15 <sup>+</sup> ARG1 <sup>-</sup> CD33 <sup>+</sup>                     | 0 (0.0-2.9)                                            | 0.2 (0.0-2.4)               | 0.5 (0.0-2.8)                   |
| CD15 <sup>+</sup> ARG1 <sup>-</sup> CD33 <sup>-</sup>                     | 17.4 (4.1-56.1)                                        | 26.6 (7.4-92.2)             | 23.7 (7.9-80.8)                 |
| <b>CD14<sup>+</sup> cells</b>                                             | <b>101.3 (43.9-254.9)</b>                              | <b>391.5 (206.5-615.1)</b>  | <b>330.1 (172.4-521.2)</b>      |
| <b>CD14<sup>+</sup>ARG1<sup>+</sup></b>                                   | 0 (0.0-7.0)                                            | 3.6 (0.6-15.8)              | 3.1 (0.5-12.9)                  |
| CD14 <sup>+</sup> ARG1 <sup>+</sup> HLA-DR <sup>+</sup> CD33 <sup>+</sup> | 0 (0.0-0.0)                                            | 0 (0.0-1.6)                 | 0 (0.0-1.5)                     |
| CD14 <sup>+</sup> ARG1 <sup>+</sup> HLA-DR <sup>+</sup> CD33 <sup>-</sup> | 0 (0.0-0.0)                                            | 1.1 (0.0-5.6)               | 0.9 (0.0-4.2)                   |
| CD14 <sup>+</sup> ARG1 <sup>+</sup> HLA-DR <sup>-</sup> CD33 <sup>+</sup> | 0 (0.0 0.0)                                            | 0.0 (0.0-1.4)               | 0 (0.0-1.6)                     |
| CD14 <sup>+</sup> ARG1 <sup>+</sup> HLA-DR <sup>-</sup> CD33 <sup>-</sup> | 0 (0.0 - 1.7)                                          | 1.0 (0.0 - 5.3)             | 0.9 (0.0 - 4.4)                 |
| <b>CD14<sup>+</sup>ARG1<sup>-</sup></b>                                   | 99.6 (42.1-229.4)                                      | 364.5 (199.5-582.7)         | 315.6 (168.5-499.2)             |
| CD14 <sup>+</sup> ARG1 <sup>-</sup> HLA-DR <sup>+</sup> CD33 <sup>+</sup> | 2.5 (0.0-13.2)                                         | 15.0 (3.8-34.9)             | 12.2 (3.4-34.1)                 |
| CD14 <sup>+</sup> ARG1 <sup>-</sup> HLA-DR <sup>+</sup> CD33 <sup>-</sup> | 17.4 (5.4-40.5)                                        | 177.33 (88.9-279.1)         | 138.9 (72.1-236.1)              |
| CD14 <sup>+</sup> ARG1 <sup>-</sup> HLA-DR <sup>-</sup> CD33 <sup>+</sup> | 7.8 (0.0-30.9)                                         | 12.3 (3.9-28.8)             | 12.1 (4.1-28.8)                 |
| CD14 <sup>+</sup> ARG1 <sup>-</sup> HLA-DR <sup>-</sup> CD33 <sup>-</sup> | 48.7 (17.5-124.7)                                      | 127.4 (65.4-212.6)          | 109.8 (55.8-201.4)              |
| <b>Overall macrophages</b>                                                | <b>153.7 (74.4-289.0)</b>                              | <b>871.0 (528.5-1375.6)</b> | <b>680.8 (418.5-1015.8)</b>     |
| <b>M1-polarized macrophages<sup>a</sup></b>                               | 39.3 (16.5-82.2)                                       | 176.8 (101.1-353.8)         | 142.5 (81.9-261.8)              |
| <b>M2-polarized macrophages<sup>a</sup></b>                               | 24.1 (6.2-72.6)                                        | 177.1 (92.3-323.6)          | 145.1 (68.2-265.4)              |

<sup>a</sup>M1-polarized macrophages were defined as macrophages in the 4<sup>th</sup> quartile and M2-polarized macrophages as macrophages in the 1<sup>st</sup> quartile of M1-M2 index distribution. Abbreviations: IQR:interquartile range

**Supplementary Table S5.** Macrophage densities and tumor nodal metastases.

| Macrophage subset <sup>a</sup>              | Nodal metastases |                   |                |
|---------------------------------------------|------------------|-------------------|----------------|
|                                             | N0<br>(n=90)     | N1<br>(n=206)     | P <sup>c</sup> |
| <b>Overall macrophages,</b><br>median (IQR) | 576<br>(353-868) | 727<br>(436-1040) | <b>0.02</b>    |
| <b>M1-polarized,</b><br>median (IQR)        | 127<br>(61-207)  | 150<br>(89-292)   | <b>0.01</b>    |
| <b>M2-polarized,</b><br>Median (IQR)        | 153<br>(79-241)  | 144<br>(67-270)   | 0.99           |

<sup>a</sup>The densities of macrophages are based on the overall cell densities (intraepithelial+stromal areas). M1-polarized macrophages were defined as macrophages in the 4<sup>th</sup> quartile and M2-polarized macrophages as macrophages in the 1<sup>st</sup> quartile of M1-M2-index distribution.

<sup>b</sup> P value calculated with Wilcoxon rank-sum test.

**Supplementary Table S6.** Myeloid immune cell densities and tumor molecular characteristics.

| Myeloid immune cell subset <sup>a</sup>                   | <i>KRAS</i> <sup>b</sup> |                   |                       | <i>CDKN2A</i> <sup>b</sup> |                   |                       | <i>SMAD4</i> <sup>b</sup> |                   |                       | <i>TP53</i> <sup>b</sup> |                   |                       |
|-----------------------------------------------------------|--------------------------|-------------------|-----------------------|----------------------------|-------------------|-----------------------|---------------------------|-------------------|-----------------------|--------------------------|-------------------|-----------------------|
|                                                           | Wild-type (n=23)         | Mutant (n=269)    | <i>P</i> <sup>c</sup> | Intact (n=99)              | Lost (n=193)      | <i>P</i> <sup>c</sup> | Intact (n=146)            | Lost (n=146)      | <i>P</i> <sup>c</sup> | Wild-type (n=105)        | Altered (n=187)   | <i>P</i> <sup>c</sup> |
| <b>CD15<sup>+</sup></b> ,<br>median (IQR)                 | 266<br>(15-600)          | 94<br>(28-333)    | 0.68                  | 106<br>(30-359)            | 94<br>(27-364)    | 0.94                  | 91<br>(32-330)            | 97<br>(26-399)    | 0.95                  | 75<br>(20-267)           | 122<br>(33-402)   | <b>0.04</b>           |
| <b>CD15<sup>+</sup>ARG1<sup>+</sup></b> ,<br>median (IQR) | 81<br>(7.2-178)          | 63<br>(16-229)    | 0.83                  | 66<br>(20-199)             | 63<br>(15-239)    | 0.93                  | 65<br>(20-194)            | 61<br>(15-292)    | 0.82                  | 47<br>(13-177)           | 71<br>(19-276)    | 0.06                  |
| <b>CD15<sup>+</sup>ARG1<sup>-</sup></b> ,<br>median (IQR) | 63<br>(7.8-175)          | 25<br>(8.3-77)    | 0.25                  | 25<br>(8.2-88)             | 26<br>(8.5-77)    | 0.70                  | 25<br>(8.3-81)            | 27<br>(8.3-82)    | 0.73                  | 22<br>(6.6-56)           | 29<br>(10-96)     | <b>0.03</b>           |
| <b>CD14<sup>+</sup></b> ,<br>median (IQR)                 | 479<br>(214-781)         | 328<br>(171-513)  | 0.08                  | 317<br>(159-513)           | 331<br>(183-523)  | 0.43                  | 365<br>(209-553)          | 286<br>(158-513)  | <b>0.04</b>           | 319<br>(180-544)         | 343<br>(172-516)  | 0.73                  |
| <b>CD14<sup>+</sup>ARG1<sup>+</sup></b> ,<br>median (IQR) | 5.1<br>(1.0-31)          | 3.0<br>(0.5-11)   | 0.61                  | 3.7<br>(1.0-11)            | 2.5<br>(0.5-13)   | 0.63                  | 3.9<br>(1.0-14.2)         | 2.1 (0.4-9.6)     | 0.08                  | 2.3<br>(0.5-9.7)         | 3.6<br>(0.5-16)   | 0.09                  |
| <b>CD14<sup>+</sup>ARG1<sup>-</sup></b> ,<br>median (IQR) | 441<br>(212-666)         | 315<br>(169-486)  | 0.10                  | 292<br>(158-511)           | 318<br>(181-499)  | 0.47                  | 354<br>(184-536)          | 266<br>(156-465)  | <b>0.03</b>           | 311<br>(174-525)         | 319<br>(170-494)  | 0.90                  |
| <b>Overall macrophages</b> ,<br>median (IQR)              | 799<br>(341-913)         | 680<br>(424-1030) | 0.88                  | 686<br>(462-1017)          | 682<br>(405-1030) | 0.49                  | 652<br>(419-914)          | 714<br>(422-1135) | 0.35                  | 635<br>(383-873)         | 723<br>(458-1142) | <b>0.04</b>           |
| <b>M1-polarized</b> ,<br>median (IQR)                     | 218<br>(94-442)          | 143<br>(81-262)   | 0.10                  | 145<br>(93-299)            | 149<br>(80-263)   | 0.48                  | 145<br>(85-278)           | 148<br>(82-261)   | 0.73                  | 146<br>(85-252)          | 146<br>(82-278)   | 0.78                  |
| <b>M2-polarized</b> ,<br>median (IQR)                     | 120<br>(26-280)          | 146<br>(63-265)   | 0.47                  | 137<br>(59-257)            | 149<br>(61-268)   | 0.71                  | 143<br>(64-237)           | 146<br>(58-275)   | 0.57                  | 121<br>(51-249)          | 148<br>(74-269)   | 0.16                  |

<sup>a</sup>The densities of myeloid immune cell subsets are based on the overall cell densities (intraepithelial + stromal areas). M1-polarized macrophages were defined as macrophages in the 4<sup>th</sup> quartile and M2-polarized macrophages as macrophages in the 1<sup>st</sup> quartile of the M1-M2-index distribution.

<sup>b</sup>The status of *KRAS*, *CDKN2A*, *SMAD4* and *TP53* was determined using a combination of pyrosequencing and next generation sequencing for *KRAS* and immunohistochemistry (IHC) and next generation sequencing for *CDKN2A*, *SMAD4* and *TP53*, as previously described (Qian et al., 2018).

<sup>c</sup>*P* value calculated with Wilcoxon rank-sum test.

Abbreviations: IQR:interquartile range

**Supplementary Table S7.** Univariable and multivariable Cox regression models for overall survival according to ARG1<sup>+</sup> and ARG1<sup>-</sup> granulocytic (CD15<sup>+</sup>) and monocytic (CD14<sup>+</sup>) cells.

| Myeloid immune cell subset <sup>a</sup> | No. of patients | Median, IQR (cells/mm <sup>2</sup> ) | Median survival (months) | Univariable HR (95% CI) | Multivariable HR (95% CI) <sup>b</sup> |
|-----------------------------------------|-----------------|--------------------------------------|--------------------------|-------------------------|----------------------------------------|
| <b>CD15<sup>+</sup>ARG1<sup>+</sup></b> |                 |                                      |                          |                         |                                        |
| Q1                                      | 72              | 6.6 (3.2-9.9)                        | 26.7                     | 1.00 (reference)        | 1.00 (reference)                       |
| Q2                                      | 73              | 27.5 (22.8-38.3)                     | 21.0                     | 1.30 (0.89-1.90)        | 1.05 (0.71-1.57)                       |
| Q3                                      | 73              | 119.2 (79.6-164.4)                   | 16.7                     | 1.62 (1.10-2.37)        | 1.24 (0.83-1.84)                       |
| Q4                                      | 72              | 555.2 (342.9-767.9)                  | 16.9                     | 1.55 (1.06-2.27)        | 1.25 (0.83-1.87)                       |
| <i>P</i> <sub>trend</sub>               |                 |                                      |                          | 0.096                   | 0.317                                  |
| <b>CD15<sup>+</sup>ARG1<sup>-</sup></b> |                 |                                      |                          |                         |                                        |
| Q1                                      | 72              | 3.3 (1.5-6.4)                        | 24.4                     | 1.00 (reference)        | 1.00 (reference)                       |
| Q2                                      | 73              | 14.9 (11.6-20.2)                     | 19.1                     | 1.49 (1.02-2.17)        | 1.32 (0.89-1.95)                       |
| Q3                                      | 73              | 49.4 (36.8-64.8)                     | 18.2                     | 1.32 (0.91-1.93)        | 1.17 (0.78-1.76)                       |
| Q4                                      | 72              | 168.2 (126.8-219.6)                  | 20.3                     | 1.24 (0.85-1.82)        | 1.08 (0.72-1.60)                       |
| <i>P</i> <sub>trend</sub>               |                 |                                      |                          | 0.808                   | 0.716                                  |
| <b>CD14<sup>+</sup>ARG1<sup>+</sup></b> |                 |                                      |                          |                         |                                        |
| Q1                                      | 115             | 0.0 (0.0-0.0)                        | 22.4                     | 1.00 (reference)        | 1.00 (reference)                       |
| Q2                                      | 58              | 3.1 (2.2-3.9)                        | 20.7                     | 1.16 (0.82-1.65)        | 1.14 (0.79-1.63)                       |
| Q3                                      | 59              | 8.8 (5.7-14.2)                       | 18.2                     | 1.19 (0.83-1.72)        | 1.04 (0.71-1.54)                       |
| Q4                                      | 58              | 34.7 (21.1-78.0)                     | 18.2                     | 1.24 (0.86-1.78)        | 1.05 (0.71-1.55)                       |
| <i>P</i> <sub>trend</sub>               |                 |                                      |                          | 0.209                   | 0.824                                  |
| <b>CD14<sup>+</sup>ARG1<sup>-</sup></b> |                 |                                      |                          |                         |                                        |
| Q1                                      | 72              | 108.7 (69.7-141.4)                   | 16.6                     | 1.00 (reference)        | 1.00 (reference)                       |
| Q2                                      | 73              | 228.4 (193.0-286.4)                  | 18.1                     | 1.13 (0.79-1.62)        | 1.03 (0.70-1.52)                       |
| Q3                                      | 73              | 416.5 (339.5-459.7)                  | 27.4                     | 0.66 (0.45-0.96)        | 0.65 (0.43-0.97)                       |
| Q4                                      | 72              | 661.6 (586.7-864.9)                  | 17.7                     | 1.12 (0.77-1.62)        | 1.04 (0.70-1.54)                       |
| <i>P</i> <sub>trend</sub>               |                 |                                      |                          | 0.634                   | 0.508                                  |

<sup>a</sup>The densities of myeloid immune cell subsets are based on the overall densities in tumor area (intraepithelial + stromal).

<sup>b</sup>Cox proportional hazards regression model adjusted for age, sex, pathologic N stage (N0, N1, Nx), tumor grade (well/moderately differentiated, poorly differentiated, unknown), lymphovascular invasion (negative, positive, unknown), resection margin status (R0, R1, R2, unknown), receipt of adjuvant treatment. Overall survival: n=290.

Abbreviations: CI:confidence interval; HR:hazard ratio; IQR:interquartile range; Q:quartile

**Supplementary Table S8.** Univariable and multivariable Cox regression models for disease-free and overall survival according to stromal and intraepithelial ARG1<sup>+</sup> granulocytic (CD15<sup>+</sup>) cells.

| Myeloid immune cell subset              | Disease-free survival |                                      |                          |                        |                                        | Overall survival |                                      |                          |                        |                                        |
|-----------------------------------------|-----------------------|--------------------------------------|--------------------------|------------------------|----------------------------------------|------------------|--------------------------------------|--------------------------|------------------------|----------------------------------------|
|                                         | No. of patients       | Median, IQR (cells/mm <sup>2</sup> ) | Median survival (months) | Univariate HR (95% CI) | Multivariable HR (95% CI) <sup>a</sup> | No. of patients  | Median, IQR (cells/mm <sup>2</sup> ) | Median survival (months) | Univariate HR (95% CI) | Multivariable HR (95% CI) <sup>a</sup> |
| <b>Stromal region</b>                   |                       |                                      |                          |                        |                                        |                  |                                      |                          |                        |                                        |
| <b>CD15<sup>+</sup>ARG1<sup>+</sup></b> |                       |                                      |                          |                        |                                        |                  |                                      |                          |                        |                                        |
| Q1                                      | 72                    | 6.6 (3.8-10.7)                       | 17.1                     | 1.00 (reference)       | 1.00 (reference)                       | 72               | 6.6 (3.8-10.7)                       | 29.4                     | 1.00 (reference)       | 1.00 (reference)                       |
| Q2                                      | 71                    | 29.1(20.8-44.3)                      | 13.4                     | 1.33 (0.89-2.00)       | 1.12 (0.73-1.73)                       | 73               | 30.7 (21.1-44.3)                     | 20.7                     | 1.44 (0.99-2.11)       | 1.04 (0.70-1.55)                       |
| Q3                                      | 73                    | 123.3 (82.0-180.7)                   | 10.1                     | 1.84 (1.25-2.73)       | 1.37 (0.90-2.09)                       | 73               | 123.3 (82.0-180.7)                   | 17.4                     | 1.65 (1.12-2.42)       | 1.13 (0.75-1.69)                       |
| Q4                                      | 70                    | 653.4 (419.8-1066.6)                 | 9.9                      | 1.83 (1.23-2.72)       | 1.95 (1.25-3.02)                       | 72               | 653.4 (420.9-1055.9)                 | 16.9                     | 1.65 (1.12-2.42)       | 1.23 (0.81-1.86)                       |
| <i>P<sub>trend</sub></i>                |                       |                                      |                          | <b>0.015</b>           | <b>0.002</b>                           |                  |                                      |                          | 0.080                  | 0.313                                  |
| <b>Intraepithelial region</b>           |                       |                                      |                          |                        |                                        |                  |                                      |                          |                        |                                        |
| <b>CD15<sup>+</sup>ARG1<sup>+</sup></b> |                       |                                      |                          |                        |                                        |                  |                                      |                          |                        |                                        |
| Q1                                      | 71                    | 0 (0-2.6)                            | 14.4                     | 1.00 (reference)       | 1.00 (reference)                       | 72               | 0 (0-3.0)                            | 24.2                     | 1.00 (reference)       | 1.00 (reference)                       |
| Q2                                      | 72                    | 20.2 (11.4-29.7)                     | 11.1                     | 1.09 (0.73-1.63)       | 0.93 (0.62-1.40)                       | 73               | 20.2 (11.5-30.0)                     | 18.5                     | 1.12 (0.77-1.63)       | 1.02 (0.69-1.51)                       |
| Q3                                      | 73                    | 81.7 (53.9-106.8)                    | 13.9                     | 1.03 (0.70-1.53)       | 1.00 (0.67-1.50)                       | 73               | 81.7 (53.9-106.8)                    | 20.3                     | 1.02 (0.70-1.48)       | 0.97 (0.66-1.44)                       |
| Q4                                      | 70                    | 284.6 (208.7-446.7)                  | 10.3                     | 1.54 (1.05-2.27)       | 1.37 (0.92-2.05)                       | 72               | 287.9 (209.3-457.2)                  | 16.9                     | 1.38 (0.95-2.00)       | 1.14 (0.77-1.69)                       |
| <i>P<sub>trend</sub></i>                |                       |                                      |                          | <b>0.017</b>           | 0.074                                  |                  |                                      |                          | 0.092                  | 0.458                                  |

<sup>a</sup>Cox proportional hazards regression model adjusted for age, sex, pathologic N stage (N0, N1, Nx), tumor grade (well/moderately differentiated, poorly differentiated, unknown), lymphovascular invasion (negative, positive, unknown), resection margin status (R0, R1, R2, unknown), receipt of adjuvant treatment. Disease-free survival: n=286; overall survival: n=290.

Abbreviations: CI:confidence interval; HR:hazard ratio; IQR:interquartile range; Q:quartile



**Supplementary Table S9.** Univariable and multivariable Cox regression models for disease-free and overall survival according to CD14<sup>+</sup>HLA-DR<sup>+</sup>CD33<sup>-</sup> and CD14<sup>+</sup>HLA-DR<sup>-</sup>CD33<sup>-</sup> cells.

| Myeloid immune cell subset                                | Disease-free survival |                                      |                          |                        |                                        | Overall survival |                                      |                          |                        |                                        |
|-----------------------------------------------------------|-----------------------|--------------------------------------|--------------------------|------------------------|----------------------------------------|------------------|--------------------------------------|--------------------------|------------------------|----------------------------------------|
|                                                           | No. of patients       | Median, IQR (cells/mm <sup>2</sup> ) | Median survival (months) | Univariate HR (95% CI) | Multivariable HR (95% CI) <sup>a</sup> | No. of patients  | Median, IQR (cells/mm <sup>2</sup> ) | Median survival (months) | Univariate HR (95% CI) | Multivariable HR (95% CI) <sup>a</sup> |
| <b>CD14<sup>+</sup>HLA-DR<sup>+</sup>CD33<sup>-</sup></b> |                       |                                      |                          |                        |                                        |                  |                                      |                          |                        |                                        |
| Q1                                                        | 70                    | 38.4 (24.6-61.6)                     | 11.1                     | 1.00 (reference)       | 1.00 (reference)                       | 72               | 38.4 (24.6-62.3)                     | 16.3                     | 1.00 (reference)       | 1.00 (reference)                       |
| Q2                                                        | 72                    | 111.7 (88.8-127.7)                   | 10.1                     | 1.08 (0.73-1.60)       | 1.33 (0.88-1.99)                       | 73               | 111.6 (88.4-126.7)                   | 16.9                     | 1.08 (0.75-1.54)       | 1.43 (0.97-2.12)                       |
| Q3                                                        | 73                    | 185.4 (162.5-215.9)                  | 16.5                     | 0.61 (0.41-0.90)       | 0.73 (0.47-1.13)                       | 73               | 185.4 (162.5-215.9)                  | 30.2                     | 0.64 (0.44-0.93)       | 0.66 (0.44-0.98)                       |
| Q4                                                        | 71                    | 333.8 (282.4-448.2)                  | 13.3                     | 0.80 (0.55-1.17)       | 0.77 (0.52-1.14)                       | 72               | 330.3 (285.0-444.9)                  | 20.7                     | 0.76 (0.52-1.10)       | 0.77 (0.52-1.15)                       |
| <i>P<sub>trend</sub></i>                                  |                       |                                      |                          | 0.051                  | <b>0.048</b>                           |                  |                                      |                          | <b>0.024</b>           | <b>0.020</b>                           |
| <b>CD14<sup>+</sup>HLA-DR<sup>-</sup>CD33<sup>-</sup></b> |                       |                                      |                          |                        |                                        |                  |                                      |                          |                        |                                        |
| Q1                                                        | 70                    | 36.8 (25.4-51.2)                     | 12.3                     | 1.00 (reference)       | 1.00 (reference)                       | 72               | 37.2 (26.4-51.2)                     | 18.1                     | 1.00 (reference)       | 1.00 (reference)                       |
| Q2                                                        | 72                    | 80.2 (64-97.5)                       | 14.4                     | 0.88 (0.59-1.31)       | 0.90 (0.60-1.36)                       | 73               | 81 (64.4-97.6)                       | 24.6                     | 0.98 (0.68-1.42)       | 1.01 (0.69-1.48)                       |
| Q3                                                        | 73                    | 149.2 (121.1-177.2)                  | 11.6                     | 1.00 (0.68-1.48)       | 1.00 (0.66-1.51)                       | 73               | 149.2 (121.1-177.2)                  | 20.5                     | 1.01 (0.69-1.50)       | 0.97 (0.64-1.45)                       |
| Q4                                                        | 71                    | 328.8 (220.5-438.9)                  | 10.5                     | 1.13 (0.77-1.66)       | 1.02 (0.68-1.54)                       | 72               | 330.8 (221.9-440.4)                  | 18.2                     | 1.17 (0.81-1.70)       | 1.17 (0.79-1.74)                       |
| <i>P<sub>trend</sub></i>                                  |                       |                                      |                          | 0.424                  | 0.800                                  |                  |                                      |                          | 0.394                  | 0.493                                  |

<sup>a</sup>Cox proportional hazards regression model adjusted for age, sex, pathologic N stage (N0, N1, Nx), tumor grade (well/moderately differentiated, poorly differentiated, unknown), lymphovascular invasion (negative, positive, unknown), resection margin status (R0, R1, R2, unknown), receipt of adjuvant treatment. Disease-free survival: n=286; overall survival: n=290.

Abbreviations: CI:confidence interval; HR:hazard ratio; IQR:interquartile range; Q:quartile

**Supplementary Table S10.** Univariable and multivariable Cox regression models for disease-free and overall survival according to overall macrophage population.

| Myeloid immune cell subset    | Disease-free survival |                                      |                          |                        |                                        | Overall survival |                                      |                          |                        |                                        |
|-------------------------------|-----------------------|--------------------------------------|--------------------------|------------------------|----------------------------------------|------------------|--------------------------------------|--------------------------|------------------------|----------------------------------------|
|                               | No. of patients       | Median, IQR (cells/mm <sup>2</sup> ) | Median survival (months) | Univariate HR (95% CI) | Multivariable HR (95% CI) <sup>a</sup> | No. of patients  | Median, IQR (cells/mm <sup>2</sup> ) | Median survival (months) | Univariate HR (95% CI) | Multivariable HR (95% CI) <sup>a</sup> |
| <b>Overall region</b>         |                       |                                      |                          |                        |                                        |                  |                                      |                          |                        |                                        |
| <b>Macrophage density</b>     |                       |                                      |                          |                        |                                        |                  |                                      |                          |                        |                                        |
| Q1                            | 69                    | 296.0 (260.3-363.2)                  | 14.1                     | 1.00 (reference)       | 1.00 (reference)                       | 72               | 299.4 (259.6-363.7)                  | 20.9                     | 1.00 (reference)       | 1.00 (reference)                       |
| Q2                            | 75                    | 548.0 (482.3-606.1)                  | 14.4                     | 0.76 (0.50-1.14)       | 0.87 (0.57-1.32)                       | 75               | 548.0 (482.3-606.1)                  | 25.9                     | 0.67 (0.46-0.97)       | 0.70 (0.47-1.05)                       |
| Q3                            | 75                    | 808.9 (738.5-913.8)                  | 14.1                     | 1.11 (0.75-1.65)       | 0.92 (0.61-1.39)                       | 75               | 808.9 (738.5-913.8)                  | 20.0                     | 1.03 (0.72-1.48)       | 0.90 (0.62-1.31)                       |
| Q4                            | 73                    | 1349.8 (1193.0-1685.3)               | 9.4                      | 1.32 (0.89-1.95)       | 1.21 (0.80-1.82)                       | 74               | 1351.5 (1193.0-1726.9)               | 17.8                     | 1.17 (0.81-1.68)       | 0.93 (0.64-1.37)                       |
| <i>P<sub>trend</sub></i>      |                       |                                      |                          | <b>0.044</b>           | 0.212                                  |                  |                                      |                          | 0.088                  | 0.846                                  |
| <b>Stromal region</b>         |                       |                                      |                          |                        |                                        |                  |                                      |                          |                        |                                        |
| <b>Macrophage density</b>     |                       |                                      |                          |                        |                                        |                  |                                      |                          |                        |                                        |
| Q1                            | 70                    | 382.8 (313.9-437.2)                  | 13.7                     | 1.00 (reference)       | 1.00 (reference)                       | 72               | 382.8 (307.5-437.1)                  | 22.4                     | 1.00 (reference)       | 1.00 (reference)                       |
| Q2                            | 74                    | 693.8 (599.4-773.3)                  | 15.9                     | 0.81 (0.54-1.23)       | 0.72 (0.47-1.09)                       | 75               | 691.2 (598.1-773.3)                  | 24.4                     | 0.89 (0.61-1.30)       | 0.79 (0.53-1.17)                       |
| Q3                            | 75                    | 1038.6 (953.9-1226.8)                | 10.6                     | 1.17 (0.80-1.73)       | 1.18 (0.78-1.78)                       | 75               | 1038.6(953.9-1226.8)                 | 20.6                     | 1.12 (0.78-1.62)       | 1.03 (0.70-1.51)                       |
| Q4                            | 73                    | 1758.9 (1550-2180.9)                 | 9.9                      | 1.32 (0.89-1.95)       | 1.19 (0.79-1.81)                       | 74               | 1760.9 (1550-2180.9)                 | 16.8                     | 1.32 (0.92-1.90)       | 1.04 (0.71-1.53)                       |
| <i>P<sub>trend</sub></i>      |                       |                                      |                          | <b>0.041</b>           | 0.084                                  |                  |                                      |                          | 0.054                  | 0.467                                  |
| <b>Intraepithelial region</b> |                       |                                      |                          |                        |                                        |                  |                                      |                          |                        |                                        |
| <b>Macrophage density</b>     |                       |                                      |                          |                        |                                        |                  |                                      |                          |                        |                                        |
| Q1                            | 71                    | 44.1 (26.8-60.8)                     | 15.9                     | 1.00 (reference)       | 1.00 (reference)                       | 73               | 44.4 (27-61.3)                       | 26.0                     | 1.00 (reference)       | 1.00 (reference)                       |
| Q2                            | 75                    | 111.5 (90.2-143)                     | 9.8                      | 1.63 (1.10-2.43)       | 1.92 (1.27-2.88)                       | 75               | 111.5 (90.2-143)                     | 19.1                     | 1.64 (1.13-2.37)       | 1.69 (1.15-2.49)                       |
| Q3                            | 75                    | 211.8 (180.9-264)                    | 11.5                     | 1.40 (0.95-2.07)       | 1.69 (1.12-2.55)                       | 75               | 211.8 (180.9-264)                    | 20.5                     | 1.36 (0.93-1.99)       | 1.61 (1.08-2.40)                       |
| Q4                            | 71                    | 494.4 (375.7-643.6)                  | 10.3                     | 1.40 (0.94-2.08)       | 1.30 (0.86-1.96)                       | 73               | 494.4 (378.6-619.5)                  | 18.2                     | 1.58 (1.09-2.29)       | 1.31 (0.88-1.94)                       |
| <i>P<sub>trend</sub></i>      |                       |                                      |                          | 0.345                  | 0.835                                  |                  |                                      |                          | 0.092                  | 0.656                                  |

<sup>a</sup>Cox proportional hazards regression model adjusted for age, sex, pathologic N stage (N0, N1, Nx), tumor grade (well/moderately differentiated, poorly differentiated, unknown), lymphovascular invasion (negative, positive, unknown), resection margin status (R0, R1, R2, unknown), receipt of adjuvant treatment. Disease-free survival: n=292; overall survival: n=296.

Abbreviations: CI, confidence interval; HR, hazard ratio; IQR, interquartile range; Q, quartile

**Supplementary Table S11.** Univariable and multivariable Cox regression models for disease-free and overall survival according to M1- and M2-polarized macrophage densities.

| Myeloid immune cell subset <sup>a</sup> | Disease-free survival |                                      |                          |                        |                                        | Overall survival |                                      |                          |                        |                                        |
|-----------------------------------------|-----------------------|--------------------------------------|--------------------------|------------------------|----------------------------------------|------------------|--------------------------------------|--------------------------|------------------------|----------------------------------------|
|                                         | No. of patients       | Median, IQR (cells/mm <sup>2</sup> ) | Median survival (months) | Univariate HR (95% CI) | Multivariable HR (95% CI) <sup>b</sup> | No. of patients  | Median, IQR (cells/mm <sup>2</sup> ) | Median survival (months) | Univariate HR (95% CI) | Multivariable HR (95% CI) <sup>b</sup> |
| <b>Overall region</b>                   |                       |                                      |                          |                        |                                        |                  |                                      |                          |                        |                                        |
| <b>M1-polarized macrophages</b>         |                       |                                      |                          |                        |                                        |                  |                                      |                          |                        |                                        |
| Q1                                      | 69                    | 47.8 (33.2-61.0)                     | 14.2                     | 1.00 (reference)       | 1.00 (reference)                       | 72               | 47.9 (32.0-62.3)                     | 21.3                     | 1.00 (reference)       | 1.00 (reference)                       |
| Q2                                      | 75                    | 109.3 (93.6-125.3)                   | 11.6                     | 1.04 (0.70-1.55)       | 0.86 (0.56-1.31)                       | 75               | 109.3 (93.6-125.3)                   | 20.0                     | 1.25 (0.86-1.81)       | 0.99 (0.66-1.47)                       |
| Q3                                      | 75                    | 184.1 (159.0-217.1)                  | 14.4                     | 0.99 (0.67-1.47)       | 1.02 (0.68-1.52)                       | 75               | 184.1 (159.0-217.1)                  | 20.1                     | 1.09 (0.75-1.59)       | 1.03 (0.70-1.54)                       |
| Q4                                      | 73                    | 378.7 (304.6-488.3)                  | 10.5                     | 1.05 (0.71-1.56)       | 0.76 (0.50-1.16)                       | 74               | 374.0 (304.6-488.3)                  | 20.5                     | 1.12 (0.77-1.62)       | 0.87 (0.59-1.29)                       |
| <i>P<sub>trend</sub></i>                |                       |                                      |                          | 0.863                  | 0.254                                  |                  |                                      |                          | 0.844                  | 0.439                                  |
| <b>M2-polarized macrophages</b>         |                       |                                      |                          |                        |                                        |                  |                                      |                          |                        |                                        |
| Q1                                      | 71                    | 37.3 (20.9-51.3)                     | 12.0                     | 1.00 (reference)       | 1.00 (reference)                       | 72               | 37.3 (21.6-51.6)                     | 23.9                     | 1.00 (reference)       | 1.00 (reference)                       |
| Q2                                      | 73                    | 103.7 (83.9-119.5)                   | 15.9                     | 0.75 (0.50-1.11)       | 0.70 (0.46-1.06)                       | 75               | 103.7 (83.9-120.2)                   | 20.9                     | 0.94 (0.65-1.35)       | 1.00 (0.68-1.48)                       |
| Q3                                      | 75                    | 192.5 (167.1-225.5)                  | 13.5                     | 0.90 (0.61-1.32)       | 1.05 (0.71-1.56)                       | 75               | 192.5 (167.1-225.5)                  | 20.5                     | 0.93 (0.64-1.34)       | 1.14 (0.78-1.68)                       |
| Q4                                      | 73                    | 353.0 (297.9-479.3)                  | 9.9                      | 1.20 (0.84-1.76)       | 1.32 (0.90-1.94)                       | 74               | 352.2 (297.9-479.3)                  | 17.7                     | 1.32 (0.92-1.89)       | 1.20 (0.83-1.74)                       |
| <i>P<sub>trend</sub></i>                |                       |                                      |                          | 0.149                  | <b>0.035</b>                           |                  |                                      |                          | 0.097                  | 0.268                                  |
| <b>Stromal region</b>                   |                       |                                      |                          |                        |                                        |                  |                                      |                          |                        |                                        |
| <b>M1-polarized macrophages</b>         |                       |                                      |                          |                        |                                        |                  |                                      |                          |                        |                                        |
| Q1                                      | 70                    | 58.8 (35-74.8)                       | 14.1                     | 1.00 (reference)       | 1.00 (reference)                       | 72               | 58.1 (34.6-73.9)                     | 24.4                     | 1.00 (reference)       | 1.00 (reference)                       |
| Q2                                      | 74                    | 132.5 (113.7-153)                    | 13.6                     | 1.01 (0.67-1.50)       | 0.80 (0.52-1.21)                       | 75               | 132 (113-153)                        | 20.9                     | 1.08 (0.74-1.56)       | 0.88 (0.59-1.31)                       |
| Q3                                      | 75                    | 223.6 (200.3-292.4)                  | 14.1                     | 0.85 (0.57-1.28)       | 0.88 (0.58-1.33)                       | 75               | 223.6 (200.3-292.4)                  | 20.6                     | 1.08 (0.74-1.57)       | 1.02 (0.69-1.52)                       |
| Q4                                      | 73                    | 480.5 (433.4-621.7)                  | 10.0                     | 1.18 (0.80-1.73)       | 0.84 (0.56-1.27)                       | 74               | 479.5 (432.3-621.7)                  | 18.5                     | 1.20 (0.83-1.73)       | 0.95 (0.65-1.41)                       |
| <i>P<sub>trend</sub></i>                |                       |                                      |                          | 0.321                  | 0.675                                  |                  |                                      |                          | 0.340                  | 0.980                                  |
| <b>M2-polarized macrophages</b>         |                       |                                      |                          |                        |                                        |                  |                                      |                          |                        |                                        |
| Q1                                      | 71                    | 51.4 (28.6-67.8)                     | 11.5                     | 1.00 (reference)       | 1.00 (reference)                       | 72               | 51.2 (27.8-67.6)                     | 23.9                     | 1.00 (reference)       | 1.00 (reference)                       |
| Q2                                      | 74                    | 138 (113-154.6)                      | 15.5                     | 0.70 (0.47-1.03)       | 0.70 (0.46-1.05)                       | 75               | 138.7 (113-159.6)                    | 22.1                     | 0.84 (0.58-1.22)       | 0.89 (0.61-1.32)                       |
| Q3                                      | 74                    | 238.3 (193-285.8)                    | 14.2                     | 0.86 (0.59-1.26)       | 0.93 (0.63-1.38)                       | 75               | 237.5 (193-285.8)                    | 20.6                     | 0.91 (0.63-1.32)       | 1.10 (0.74-1.62)                       |
| Q4                                      | 73                    | 473.6 (378.6-593.1)                  | 9.7                      | 1.24 (0.85-1.80)       | 1.31 (0.89-1.94)                       | 74               | 464 (378.6-593.1)                    | 17.7                     | 1.42 (1.00-2.03)       | 1.25 (0.86-1.80)                       |
| <i>P<sub>trend</sub></i>                |                       |                                      |                          | 0.076                  | <b>0.044</b>                           |                  |                                      |                          | <b>0.017</b>           | 0.136                                  |
| <b>Intraepithelial region</b>           |                       |                                      |                          |                        |                                        |                  |                                      |                          |                        |                                        |

**M1-polarized macrophages**

|                          |    |                     |      |                  |                  |    |                    |      |                  |                  |
|--------------------------|----|---------------------|------|------------------|------------------|----|--------------------|------|------------------|------------------|
| Q1                       | 71 | 9.2 (1.4-14.5)      | 14.3 | 1.00 (reference) | 1.00 (reference) | 72 | 8.8(1.9-14.3)      | 25.3 | 1.00 (reference) | 1.00 (reference) |
| Q2                       | 74 | 26.7 (19.4-34.7)    | 14.2 | 0.92 (0.62-1.37) | 0.92 (0.61-1.38) | 75 | 26.5(19.4-34.7)    | 20.6 | 1.27 (0.87-1.85) | 1.23 (0.83-1.83) |
| Q3                       | 73 | 53.4 (44.8-66.3)    | 9.6  | 1.32 (0.90-1.95) | 1.21 (0.80-1.83) | 75 | 54.1(44.8-67.6)    | 17.4 | 1.64 (1.13-2.39) | 1.55 (1.04-2.31) |
| Q4                       | 74 | 130.2 (108.4-188.4) | 10.3 | 1.11 (0.76-1.63) | 1.03 (0.69-1.54) | 74 | 130.2(108.4-188.4) | 20.1 | 1.30 (0.89-1.88) | 1.20 (0.81-1.77) |
| <i>P<sub>trend</sub></i> |    |                     |      | 0.432            | 0.746            |    |                    |      | 0.311            | 0.596            |

**M2-polarized macrophages**

|                          |    |                    |      |                  |                  |    |                   |      |                  |                  |
|--------------------------|----|--------------------|------|------------------|------------------|----|-------------------|------|------------------|------------------|
| Q1                       | 72 | 0.0 (0.0-4.40)     | 14.3 | 1.00 (reference) | 1.00 (reference) | 72 | 0.0(0.0-4.4)      | 25.8 | 1.00 (reference) | 1.00 (reference) |
| Q2                       | 73 | 12.7 (9.0-16.6)    | 12.3 | 1.27 (0.86-1.87) | 0.92 (0.61-1.40) | 75 | 12.9 (9.0-16.6)   | 20.0 | 1.22 (0.84-1.78) | 1.02 (0.69-1.50) |
| Q3                       | 74 | 40.6 (30.2-56.3)   | 11.1 | 1.32 (0.89-1.96) | 1.11 (0.73-1.68) | 75 | 40.7(30.2-56.3)   | 18.4 | 1.40 (0.97-2.03) | 1.14 (0.77-1.70) |
| Q4                       | 73 | 145.6 (95.6-212.8) | 11.1 | 1.41 (0.96-2.06) | 1.34 (0.89-2.01) | 74 | 144.4(93.8-212.8) | 17.8 | 1.42 (0.98-2.06) | 1.23 (0.83-1.83) |
| <i>P<sub>trend</sub></i> |    |                    |      | 0.156            | 0.071            |    |                   |      | 0.119            | 0.250            |

<sup>a</sup>M1-polarized macrophages were defined as macrophages in the 4<sup>th</sup> and M2-polarized macrophages as macrophages in the 1<sup>st</sup> quartile of M1-M2-index distribution.

<sup>b</sup>Cox proportional hazards regression model adjusted for age, sex, pathologic N stage (N0, N1, Nx), tumor grade (well/moderately differentiated, poorly differentiated, unknown), lymphovascular invasion (negative, positive, unknown), resection margin status (R0, R1, R2, unknown), receipt of adjuvant treatment. Disease-free survival: n=292; overall survival: n=296.

Abbreviations: CI:confidence interval; HR:hazard ratio; IQR:interquartile range; Q:quartile

**Supplementary Table S12.** Univariable and multivariable Cox regression models for disease-free and overall survival according to Gcross spatial measurements between tumor cells and M1- and M2-polarized macrophages.

| Gross function measurements <sup>a</sup> | Disease-free survival |                                      |                          |                         |                                        | Overall survival |                                      |                          |                         |                                        |
|------------------------------------------|-----------------------|--------------------------------------|--------------------------|-------------------------|----------------------------------------|------------------|--------------------------------------|--------------------------|-------------------------|----------------------------------------|
|                                          | No. of patients       | Median, IQR (cells/mm <sup>2</sup> ) | Median survival (months) | Univariable HR (95% CI) | Multivariable HR (95% CI) <sup>b</sup> | No. of patients  | Median, IQR (cells/mm <sup>2</sup> ) | Median survival (months) | Univariable HR (95% CI) | Multivariable HR (95% CI) <sup>b</sup> |
| <b>10µm radius</b>                       |                       |                                      |                          |                         |                                        |                  |                                      |                          |                         |                                        |
| <b>G<sub>tumor</sub>:M1</b>              |                       |                                      |                          |                         |                                        |                  |                                      |                          |                         |                                        |
| Q1                                       | 72                    | 0.003(0.001-0.004)                   | 17.1                     | 1.00 (reference)        | 1.00 (reference)                       | 73               | 0.003 (0.002-0.004)                  | 25.8                     | 1.00 (reference)        | 1.00 (reference)                       |
| Q2                                       | 73                    | 0.008(0.006-0.009)                   | 12.3                     | 1.33 (0.89-1.97)        | 1.10 (0.72-1.67)                       | 75               | 0.007 (0.006-0.009)                  | 16.8                     | 1.40 (0.97-2.02)        | 1.19 (0.80-1.77)                       |
| Q3                                       | 74                    | 0.01(0.01-0.02)                      | 11.1                     | 1.23 (0.83-1.83)        | 1.06 (0.69-1.63)                       | 74               | 0.01 (0.01-0.02)                     | 19.7                     | 1.25 (0.86-1.80)        | 0.99 (0.65-1.49)                       |
| Q4                                       | 73                    | 0.03(0.02-0.04)                      | 10.8                     | 1.20 (0.81-1.77)        | 1.00 (0.65-1.52)                       | 74               | 0.03 (0.02-0.04)                     | 20.3                     | 1.14 (0.79-1.65)        | 0.87 (0.59-1.28)                       |
| <i>P<sub>trend</sub></i>                 |                       |                                      |                          | 0.642                   | 0.800                                  |                  |                                      |                          | 0.897                   | 0.223                                  |
| <b>G<sub>tumor</sub>:M2</b>              |                       |                                      |                          |                         |                                        |                  |                                      |                          |                         |                                        |
| Q1                                       | 73                    | 0.001 (0.001-0.001)                  | 14.4                     | 1.00 (reference)        | 1.00 (reference)                       | 73               | 0.001 (0.001-0.001)                  | 25.3                     | 1.00 (reference)        | 1.00 (reference)                       |
| Q2                                       | 73                    | 0.003 (0.003-0.004)                  | 12.1                     | 1.33 (0.90-1.98)        | 1.35 (0.90-2.03)                       | 74               | 0.003 (0.003-0.004)                  | 20.9                     | 1.17 (0.80-1.71)        | 1.22 (0.83-1.78)                       |
| Q3                                       | 73                    | 0.008 (0.007-0.010)                  | 11.1                     | 1.51 (1.01-2.26)        | 1.46 (0.96-2.22)                       | 75               | 0.008 (0.007-0.010)                  | 20.4                     | 1.42 (0.98-2.07)        | 1.36 (0.92-1.99)                       |
| Q4                                       | 73                    | 0.02 (0.02-0.03)                     | 10.0                     | 1.77 (1.20-2.62)        | 1.80 (1.21-2.68)                       | 74               | 0.02 (0.02-0.03)                     | 18.2                     | 1.70 (1.18-2.45)        | 1.50 (1.02-2.19)                       |
| <i>P<sub>trend</sub></i>                 |                       |                                      |                          | <b>0.006</b>            | <b>0.007</b>                           |                  |                                      |                          | <b>0.004</b>            | 0.064                                  |
| <b>20µm radius</b>                       |                       |                                      |                          |                         |                                        |                  |                                      |                          |                         |                                        |
| <b>G<sub>tumor</sub>:M1</b>              |                       |                                      |                          |                         |                                        |                  |                                      |                          |                         |                                        |
| Q1                                       | 73                    | 0.03(0.02-0.04)                      | 14.3                     | 1.00 (reference)        | 1.00 (reference)                       | 74               | 0.03(0.02-0.04)                      | 25.8                     | 1.00 (reference)        | 1.00 (reference)                       |
| Q2                                       | 73                    | 0.06(0.05-0.07)                      | 13.8                     | 1.29 (0.87-1.92)        | 1.22 (0.80-1.84)                       | 75               | 0.06(0.05-0.07)                      | 20.9                     | 1.38 (0.95-2.01)        | 1.34 (0.90-1.99)                       |
| Q3                                       | 73                    | 0.10(0.09-0.11)                      | 11.5                     | 1.17 (0.78-1.74)        | 1.11 (0.72-1.71)                       | 73               | 0.1(0.09-0.11)                       | 18.2                     | 1.18 (0.82-1.71)        | 0.98 (0.65-1.47)                       |
| Q4                                       | 73                    | 0.18(0.15-0.23)                      | 10.3                     | 1.35 (0.91-1.98)        | 1.10 (0.72-1.68)                       | 74               | 0.18(0.15-0.23)                      | 20.1                     | 1.37 (0.94-1.98)        | 1.04 (0.71-1.54)                       |
| <i>P<sub>trend</sub></i>                 |                       |                                      |                          | 0.222                   | 0.939                                  |                  |                                      |                          | 0.209                   | 0.730                                  |
| <b>G<sub>tumor</sub>:M2</b>              |                       |                                      |                          |                         |                                        |                  |                                      |                          |                         |                                        |
| Q1                                       | 73                    | 0.009(0.005-0.014)                   | 15.5                     | 1.00 (reference)        | 1.00 (reference)                       | 73               | 0.009 (0.005-0.013)                  | 25.3                     | 1.00 (reference)        | 1.00 (reference)                       |
| Q2                                       | 73                    | 0.03(0.02-0.03)                      | 13.1                     | 1.41 (0.94-2.11)        | 1.23 (0.81-1.88)                       | 74               | 0.03(0.02-0.03)                      | 20.9                     | 1.37 (0.94-1.99)        | 1.32 (0.88-1.96)                       |
| Q3                                       | 73                    | 0.06(0.05-0.07)                      | 11.1                     | 1.52 (1.02-2.26)        | 1.55 (1.01-2.39)                       | 75               | 0.06(0.05-0.07)                      | 20.5                     | 1.34 (0.92-1.95)        | 1.10 (0.73-1.65)                       |
| Q4                                       | 73                    | 0.13(0.11-0.18)                      | 10.2                     | 1.83 (1.25-2.70)        | 1.72 (1.14-2.60)                       | 74               | 0.13(0.11-0.18)                      | 17.7                     | 1.74 (1.21-2.51)        | 1.59 (1.08-2.35)                       |
| <i>P<sub>trend</sub></i>                 |                       |                                      |                          | <b>0.004</b>            | <b>0.009</b>                           |                  |                                      |                          | <b>0.007</b>            | 0.114                                  |
| <b>30 µm radius</b>                      |                       |                                      |                          |                         |                                        |                  |                                      |                          |                         |                                        |
| <b>G<sub>tumor</sub>:M1</b>              |                       |                                      |                          |                         |                                        |                  |                                      |                          |                         |                                        |
| Q1                                       | 71                    | 0.07 (0.06-0.10)                     | 14.1                     | 1.00 (reference)        | 1.00 (reference)                       | 73               | 0.07 (0.06-0.10)                     | 23.9                     | 1.00 (reference)        | 1.00 (reference)                       |
| Q2                                       | 74                    | 0.15 (0.13-0.18)                     | 14.1                     | 1.08 (0.72-1.61)        | 1.02 (0.67-1.55)                       | 75               | 0.15 (0.13-0.18)                     | 24.4                     | 1.25 (0.86-1.82)        | 1.11 (0.74-1.65)                       |
| Q3                                       | 73                    | 0.25 (0.21-0.27)                     | 13.6                     | 1.00 (0.67-1.48)        | 0.90 (0.59-1.37)                       | 75               | 0.24 (0.21-0.27)                     | 18.2                     | 1.09 (0.75-1.58)        | 0.93 (0.62-1.38)                       |
| Q4                                       | 74                    | 0.40 (0.33-0.49)                     | 10.3                     | 1.18 (0.80-1.73)        | 0.91 (0.60-1.39)                       | 73               | 0.40 (0.33-0.49)                     | 20.3                     | 1.27 (0.88-1.84)        | 0.96 (0.65-1.42)                       |
| <i>P<sub>trend</sub></i>                 |                       |                                      |                          | 0.440                   | 0.596                                  |                  |                                      |                          | 0.325                   | 0.637                                  |

| <b>G<sub>tumor:M2</sub></b> |    |                  |      |                  |                  |    |                  |      |                  |                  |
|-----------------------------|----|------------------|------|------------------|------------------|----|------------------|------|------------------|------------------|
| Q1                          | 73 | 0.03 (0.02-0.04) | 14.9 | 1.00 (reference) | 1.00 (reference) | 74 | 0.03 (0.02-0.04) | 25.3 | 1.00 (reference) | 1.00 (reference) |
| Q2                          | 73 | 0.07 (0.06-0.09) | 11.1 | 1.50 (1.01-2.24) | 1.43 (0.95-2.16) | 74 | 0.07 (0.06-0.09) | 21.0 | 1.45 (1.00-2.10) | 1.57 (1.08-2.30) |
| Q3                          | 72 | 0.15 (0.12-0.17) | 9.9  | 1.55 (1.04-2.31) | 1.64 (1.07-2.51) | 74 | 0.15 (0.12-0.17) | 20.1 | 1.39 (0.95-2.01) | 1.25 (0.84-1.87) |
| Q4                          | 74 | 0.29 (0.25-0.35) | 12.3 | 1.65 (1.12-2.44) | 1.68 (1.12-2.52) | 74 | 0.29 (0.25-0.35) | 18.4 | 1.59 (1.10-2.30) | 1.49 (1.01-2.18) |
| <i>P<sub>trend</sub></i>    |    |                  |      | <b>0.028</b>     | <b>0.025</b>     |    |                  |      | <b>0.038</b>     | 0.164            |

<sup>a</sup>Kaplan-Meier edge corrected G<sub>cross</sub> function values measured as the probability of finding at least one macrophage/M1-polarized macrophage/M2-polarized macrophage within a 10µm, 20µm or 30µm radius from a tumor cell. M1-polarized macrophages were defined as macrophages in the 4<sup>th</sup> and M2-polarized macrophages as macrophages in the 1<sup>st</sup> quartile of M1-M2-index distribution.

<sup>b</sup>Cox proportional hazards regression model adjusted for age, sex, pathologic N stage (N0, N1, Nx), tumor grade, well/moderately differentiated, poorly differentiated, unknown), lymphovascular invasion (negative, positive, unknown), resection margin status (R0, R1, R2, unknown), and receipt of adjuvant treatment. Disease-free survival: n=292; overall survival: n=296.

Abbreviations: CI:confidence interval; HR:hazard ratio; IQR:interquartile range; Q:quartile

**Supplementary Table S13.** Disease-free survival according to combined M2-polarized macrophage density and Cross spatial distance function between tumor cells and M2-polarized macrophages.

| Combined density and spatial groups <sup>a</sup> | No. of patients | Disease-free survival    |                         |                                        |
|--------------------------------------------------|-----------------|--------------------------|-------------------------|----------------------------------------|
|                                                  |                 | Median survival (months) | Univariable HR (95% CI) | Multivariable HR (95% CI) <sup>b</sup> |
| <b>10µm radius</b>                               |                 |                          |                         |                                        |
| Dens <sub>Low</sub> -Spatial <sub>Low</sub>      | 113             | 14.3                     | 1.00 (reference)        | 1.00 (reference)                       |
| Dens <sub>Low</sub> -Spatial <sub>High</sub>     | 31              | 7.0                      | 1.69 (0.99-2.73)        | 1.18 (0.71-1.95)                       |
| Dens <sub>High</sub> -Spatial <sub>Low</sub>     | 32              | 14.1                     | 1.10 (0.67-1.80)        | 1.15 (0.70-1.89)                       |
| Dens <sub>High</sub> -Spatial <sub>High</sub>    | 116             | 11.6                     | 1.38 (1.01-1.87)        | 1.52 (1.10-2.09)                       |
| <i>P<sub>interaction</sub></i>                   |                 |                          | 0.196                   | 0.224                                  |
| <b>20µm radius</b>                               |                 |                          |                         |                                        |
| Dens <sub>Low</sub> -Spatial <sub>Low</sub>      | 117             | 14.1                     | 1.00 (reference)        | 1.00 (reference)                       |
| Dens <sub>Low</sub> -Spatial <sub>High</sub>     | 27              | 7.0                      | 1.44 (0.90-2.32)        | 1.15 (0.67-1.98)                       |
| Dens <sub>High</sub> -Spatial <sub>Low</sub>     | 28              | 14.1                     | 0.94 (0.55-1.61)        | 1.02 (0.59-1.76)                       |
| Dens <sub>High</sub> -Spatial <sub>High</sub>    | 120             | 11.5                     | 1.37 (1.01-1.86)        | 1.54 (1.12-2.13)                       |
| <i>P<sub>interaction</sub></i>                   |                 |                          | 0.077                   | <b>0.035</b>                           |
| <b>30µm radius</b>                               |                 |                          |                         |                                        |
| Dens <sub>Low</sub> -Spatial <sub>Low</sub>      | 116             | 13.6                     | 1.00 (reference)        | 1.00 (reference)                       |
| Dens <sub>Low</sub> -Spatial <sub>High</sub>     | 31              | 10.1                     | 1.17 (0.72-1.89)        | 0.94 (0.55-1.62)                       |
| Dens <sub>High</sub> -Spatial <sub>Low</sub>     | 31              | 14.1                     | 0.92 (0.55-1.56)        | 0.97 (0.57-1.64)                       |
| Dens <sub>High</sub> -Spatial <sub>High</sub>    | 118             | 11.1                     | 1.31 (0.97-1.78)        | 1.50 (1.09-2.07)                       |
| <i>P<sub>interaction</sub></i>                   |                 |                          | 0.252                   | 0.109                                  |

<sup>a</sup>Combined M2-polarized macrophage density and spatial groups were defined using the median according to the distribution of M2-polarized macrophage density and  $G_{\text{tumor:M2}}$  measurements within 10µm, 20 µm and 30 µm radii. M2-polarized macrophages were defined as macrophages in the 1<sup>st</sup> quartile of M1-M2-index distribution and Kaplan-Meier edge corrected Gcross function values were measured as the probability of finding at least one M2-polarized macrophage within a 10µm, 20µm or 30µm radius from a tumor cell.

<sup>b</sup>Cox proportional hazards regression model adjusted for age, sex, pathologic N stage (N0, N1, Nx), tumor grade (well/moderately differentiated, poorly differentiated, unknown), lymphovascular invasion (negative, positive, unknown), resection margin status (R0, R1, R2, unknown), and receipt of adjuvant treatment. Disease-free survival: n=292.

Abbreviations: CI:confidence interval; HR:hazard ratio

**Supplementary Table S14.** Univariable and multivariable Cox regression models for disease-free survival according to density-adjusted G<sub>tumor:M2</sub> Gross spatial measurements between tumor cells and M2-polarized macrophages within 20 µm radius.

| Density-adjusted<br>G <sub>tumor:M2</sub> | No. of<br>patients | Median, IQR (model<br>residual) | Median<br>survival<br>(months) | Univariable<br>HR (95% CI) | Multivariable1<br>HR (95% CI) <sup>b</sup> | Multivariable2<br>HR (95% CI) <sup>c</sup> |
|-------------------------------------------|--------------------|---------------------------------|--------------------------------|----------------------------|--------------------------------------------|--------------------------------------------|
| Q1                                        | 71                 | -1.0 (-1.6-0.6)                 | 13.4                           | 1.00 (reference)           | 1.00 (reference)                           | 1.0 (reference)                            |
| Q2                                        | 75                 | -0.1 (-0.2-0.0)                 | 14.2                           | 0.99 (0.97-1.01)           | 1.21 (0.81-1.82)                           | 1.21 (0.80-1.81)                           |
| Q3                                        | 74                 | 0.3 (0.2-0.4)                   | 11.9                           | 1.08 (0.95-1.23)           | 1.31 (0.88-1.96)                           | 1.30 (0.87-1.95)                           |
| Q4                                        | 72                 | 1.0 (0.8-1.2)                   | 9.9                            | 1.23 (0.91-1.68)           | 1.59 (1.07-2.36)                           | 1.59 (1.07-2.36)                           |
| P <sub>trend</sub>                        |                    |                                 |                                | 0.07                       | <b>0.02</b>                                | <b>0.02</b>                                |

<sup>a</sup>Kaplan-Meier edge corrected G<sub>tumor:M2</sub> function values measured as the probability of finding at least one M2-polarized macrophage within a 20 µm radius from a tumor cell. M2-polarized macrophages were defined as macrophages in the 1<sup>st</sup> quartile of M1-M2-index distribution.

<sup>b</sup>Cox proportional hazards regression model adjusted for age, sex, pathologic N stage (N0, N1, Nx), tumor grade (well/moderately differentiated, poorly differentiated, unknown), lymphovascular invasion (negative, positive, unknown), resection margin status (R0, R1, R2, unknown), and receipt of adjuvant treatment. Disease-free survival: n=292.

<sup>c</sup>Additionally adjusted for M2-polarized macrophage density.

Abbreviations: CI:confidence interval; HR:hazard ratio; IQR:interquartile range; Q:quartile



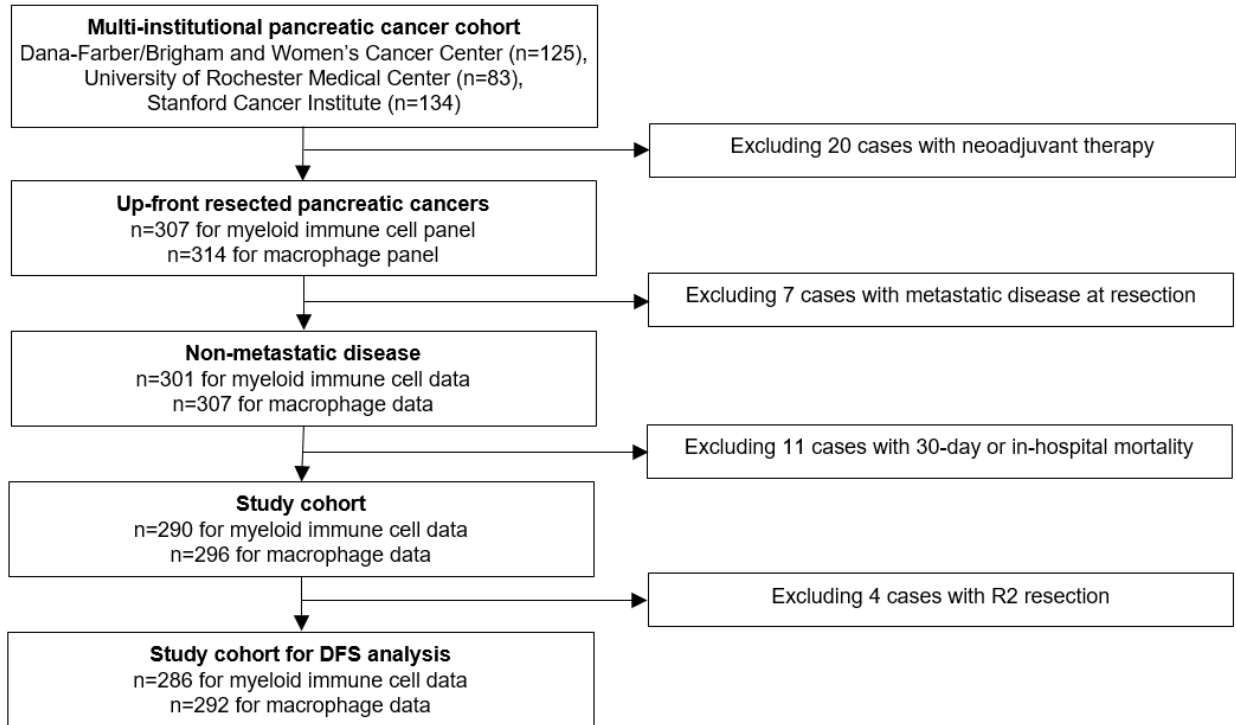

**Supplementary Figure S1. Flow chart of the study cohort for outcome analyses.**

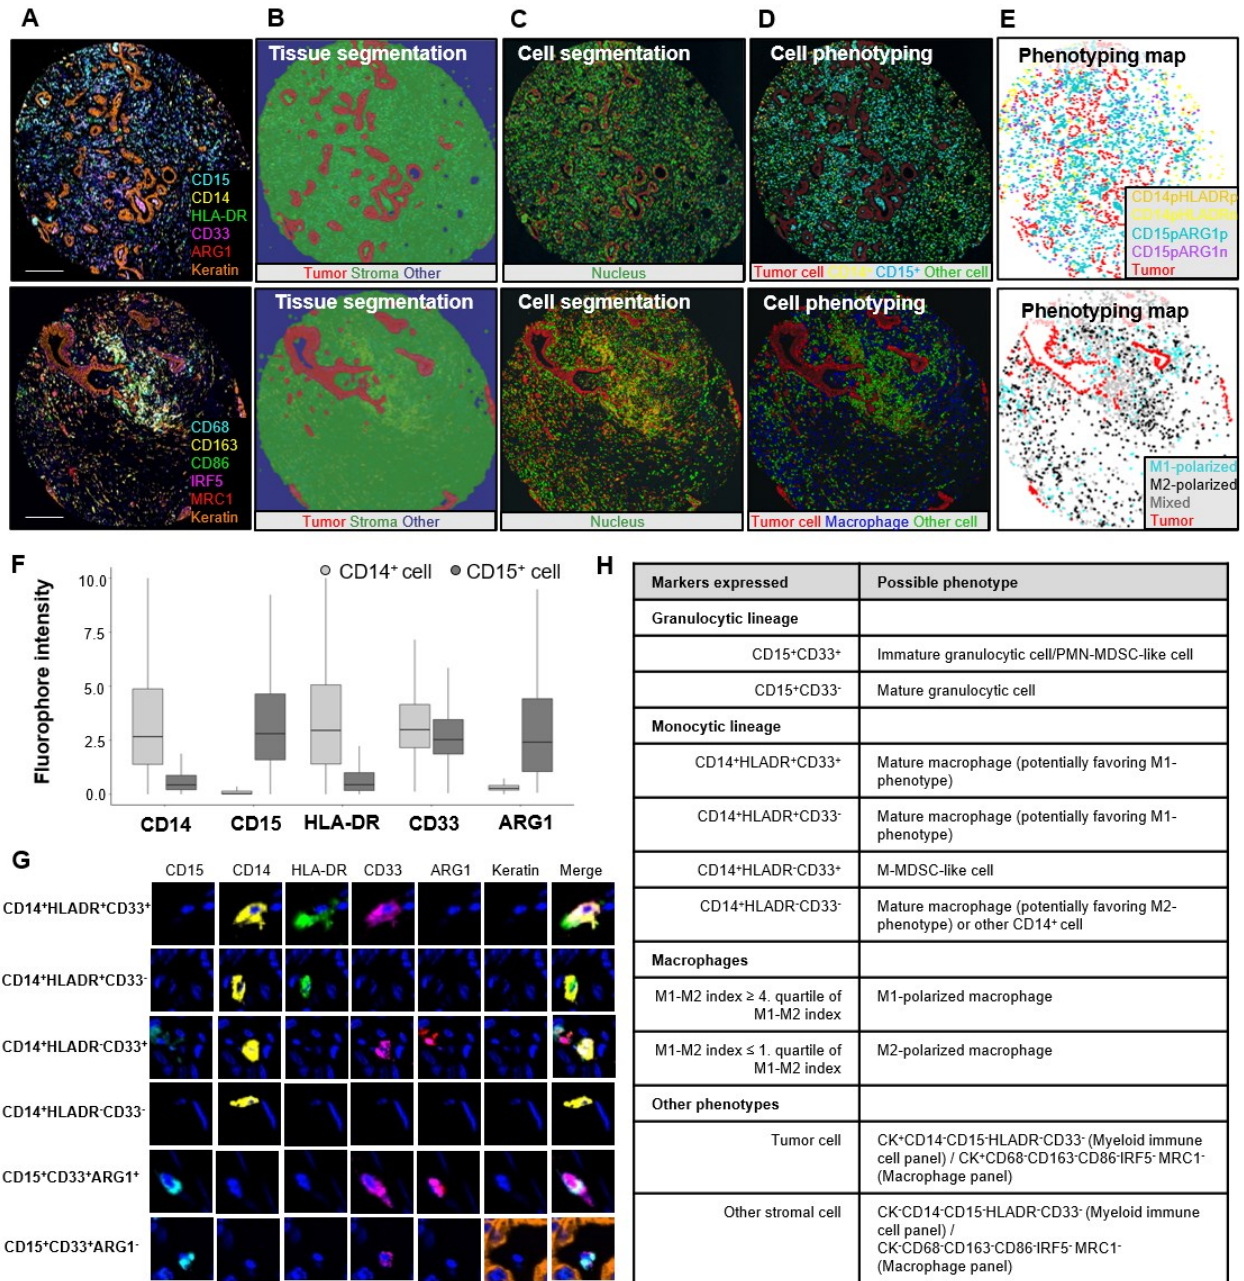

**Supplementary Figure S2. Methodology and gating strategy for myeloid immune cell detection.**

Example images of myeloid cell and macrophage panels (A). Sequential analysis steps included tissue compartment segmentation (B), cell segmentation (C), and cell phenotyping (D). Phenotyping maps generated with the R Statistical programming language show examples of detected phenotypes with myeloid immune cell and macrophage panels (E). Fluorophore signal intensities in monocytic (CD14<sup>+</sup>) and granulocytic cells (CD15<sup>+</sup>) (F). Details of detected phenotypes from myeloid immune cell and macrophage panels (G and H). The scale bar is 200 μm. Abbreviations: M-MDSC: monocytic myeloid-derived suppressor cell; PMN-MDSC: polymorphonuclear myeloid-derived suppressor cell.

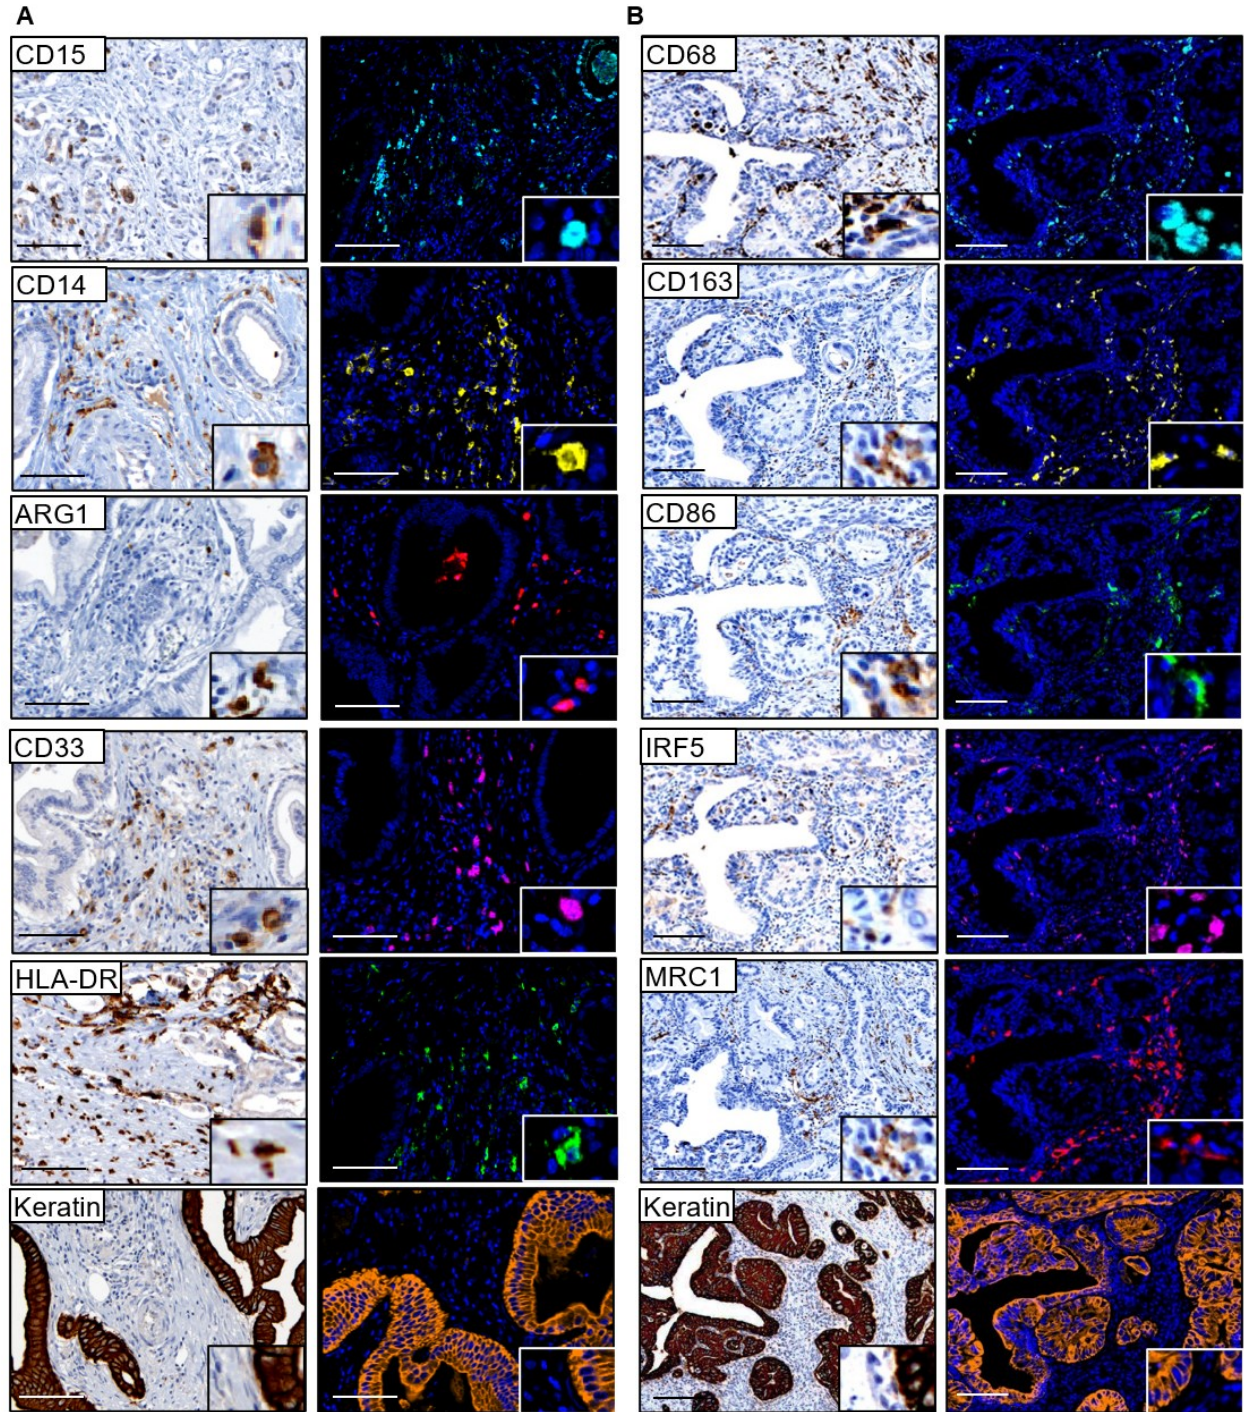

**Supplementary Figure S3. Comparison of staining patterns between chromogenic immunohistochemistry (IHC) and multiplex immunofluorescence (mIF).**

Myeloid cell (A) and macrophage (B) markers showed comparable staining patterns between monoplex IHC and mIF. The scale bar is 100  $\mu\text{m}$ .

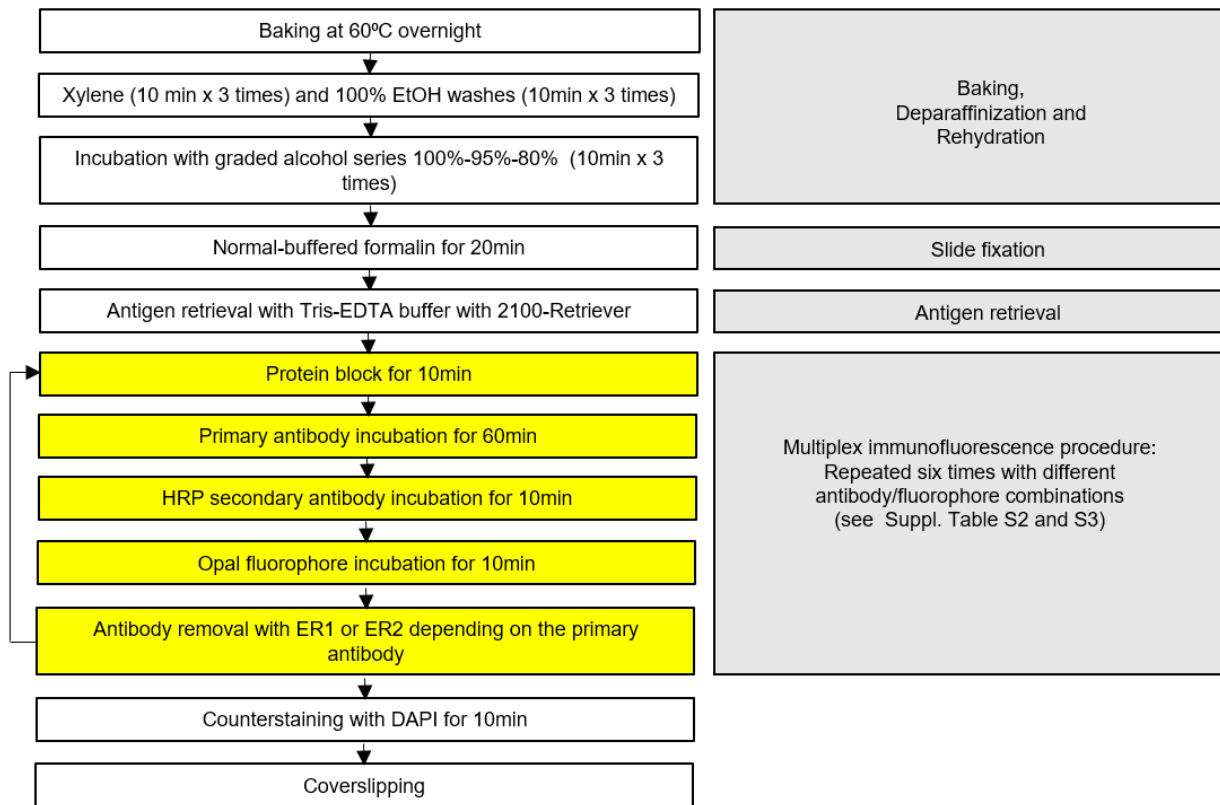

**Supplementary Figure S4. Flow chart of the cyclic immunofluorescence procedure.**

The repeated steps in cyclic multiplex immunofluorescence procedure (yellow) were performed with a Leica BOND RX Research automated staining instrument.

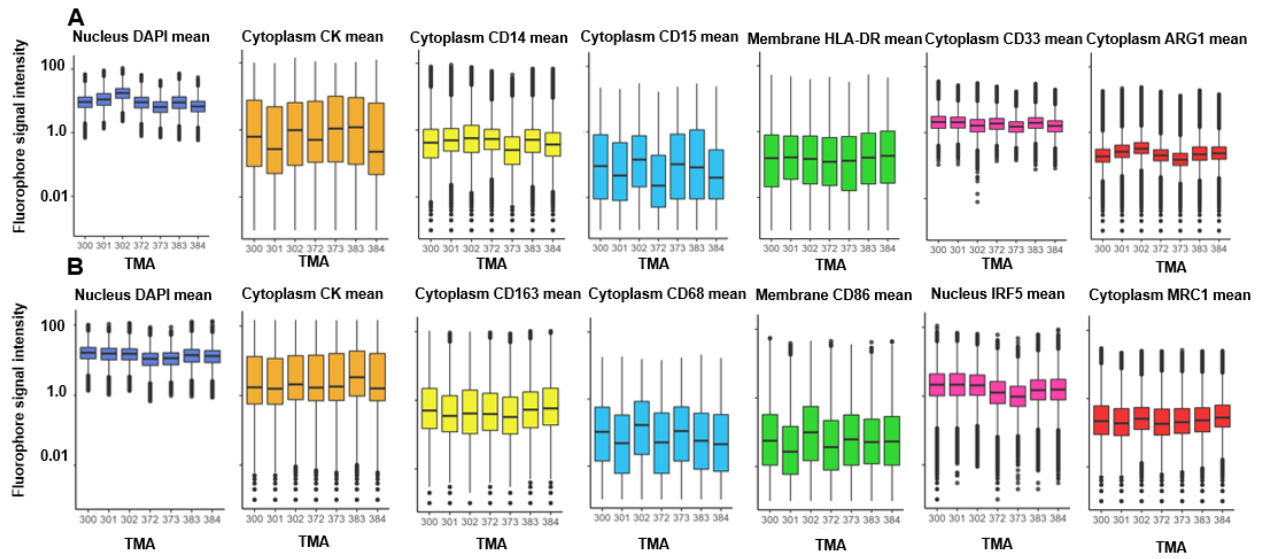

**Supplementary Figure S5. Fluorophore signal intensities across resected pancreatic cancer tissue microarrays (TMA) for myeloid immune cell (A) and macrophage (B) panel markers. X axis labels indicate identification numbers of seven study TMAs.**

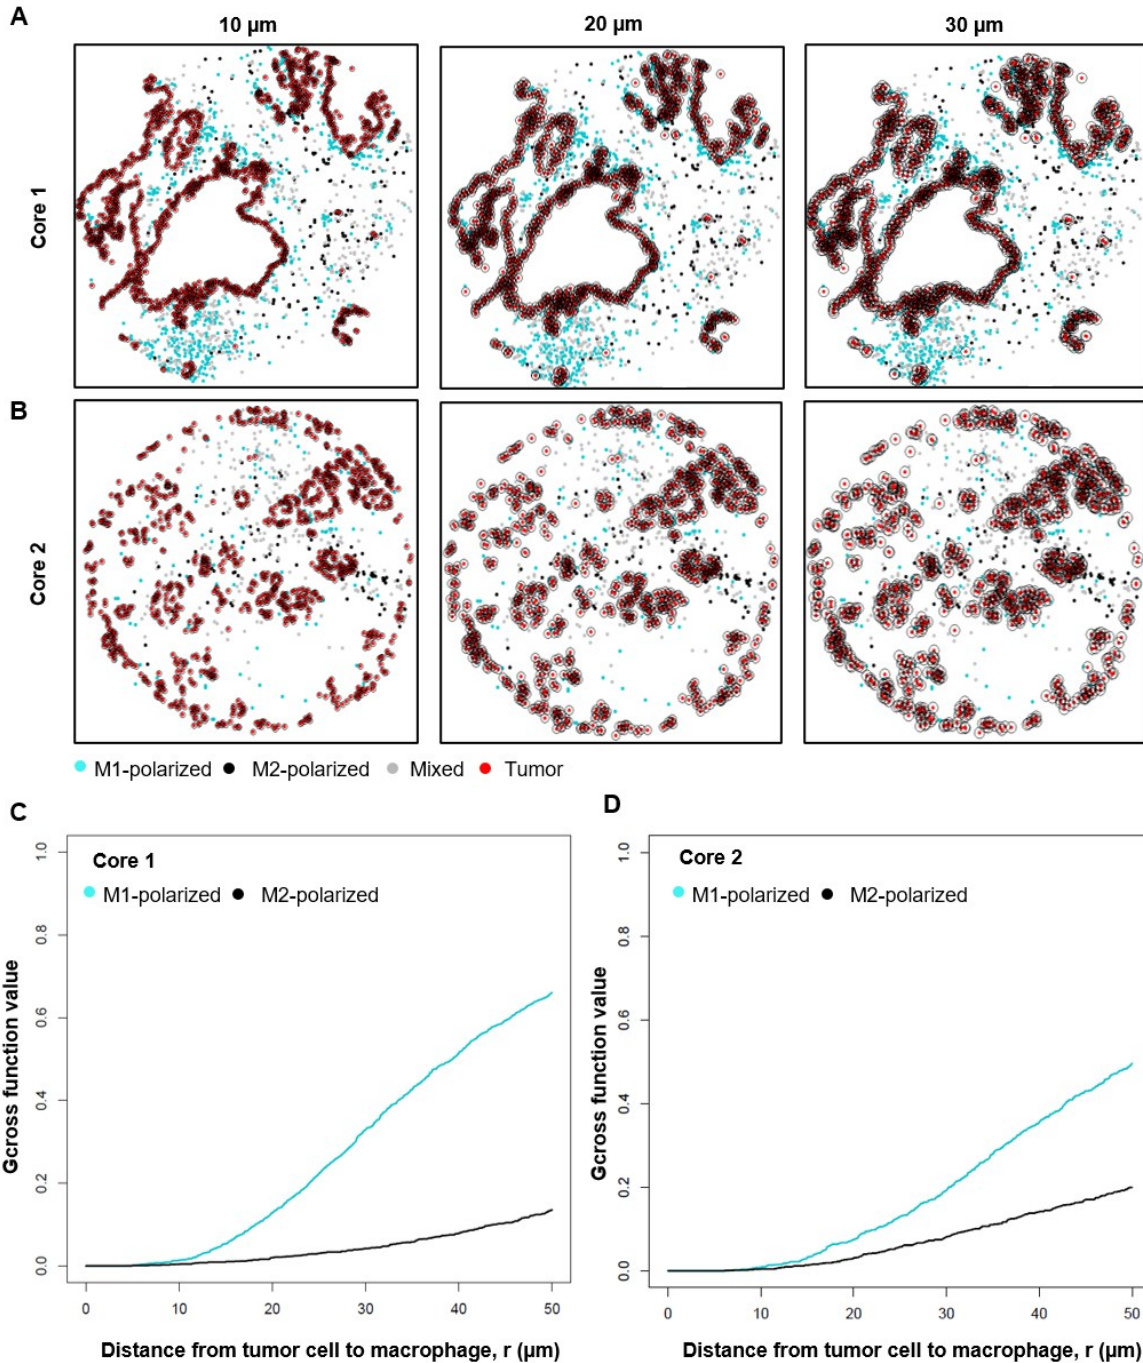

**Supplementary Figure S6. Examples of spatial Gcross function analysis between tumor cells and macrophage populations.**

$G_{\text{tumor:M1}}(r)$  evaluates the probability of a tumor cell being co-located with at least one M1-polarized macrophage and  $G_{\text{tumor:M2}}(r)$  the probability of co-location with at least one M2-polarized macrophage within a specified radius,  $r$  (examples 10 $\mu\text{m}$ , 20 $\mu\text{m}$ , and 30 $\mu\text{m}$ ) (A-B). The output curves showing the function value with each radius indicate that, in these two example cores, the probability of a tumor cell being co-located with at least one M1-polarized macrophage is higher than the probability of co-location with a M2-polarized macrophage at all tested radii (C-D).

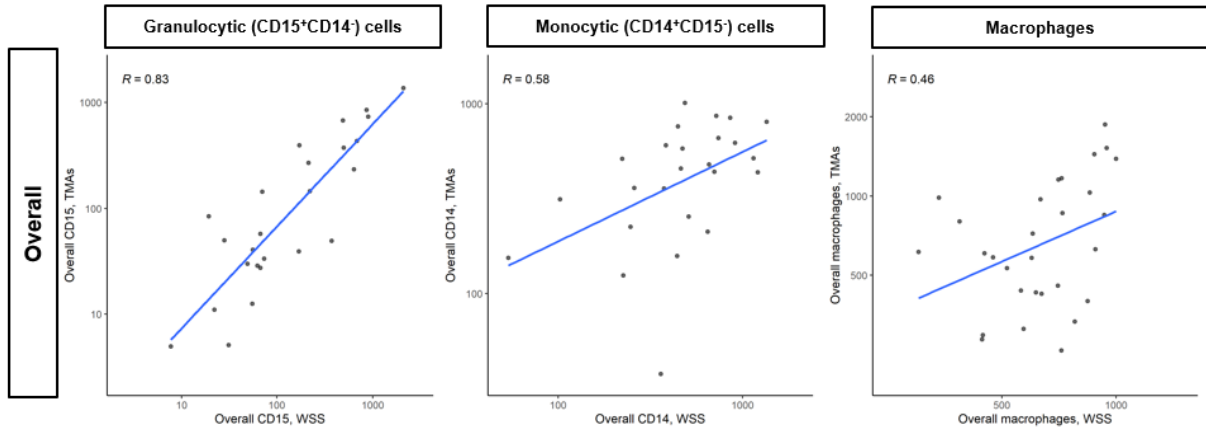

**Supplementary Figure S7. Correlations between tissue microarray cores and whole-slide sections of myeloid immune cell densities.**

Spearman correlation coefficients ( $R$ ) were calculated between 29 randomly selected cases with macrophage data and 27 randomly selected cases with MDSC data. On average, 5.5 images (1.36 mm<sup>2</sup> per image) were obtained from whole-slide sections and the Spearman correlation coefficients for granulocytic cell (CD15<sup>+</sup>CD14<sup>-</sup>), monocytic cell (CD14<sup>+</sup>CD15<sup>-</sup>) and macrophage densities were calculated between the tissue microarray cores and the whole-slide sections.

Abbreviations: WSS: whole-slide section; TMA: tissue-microarray

A

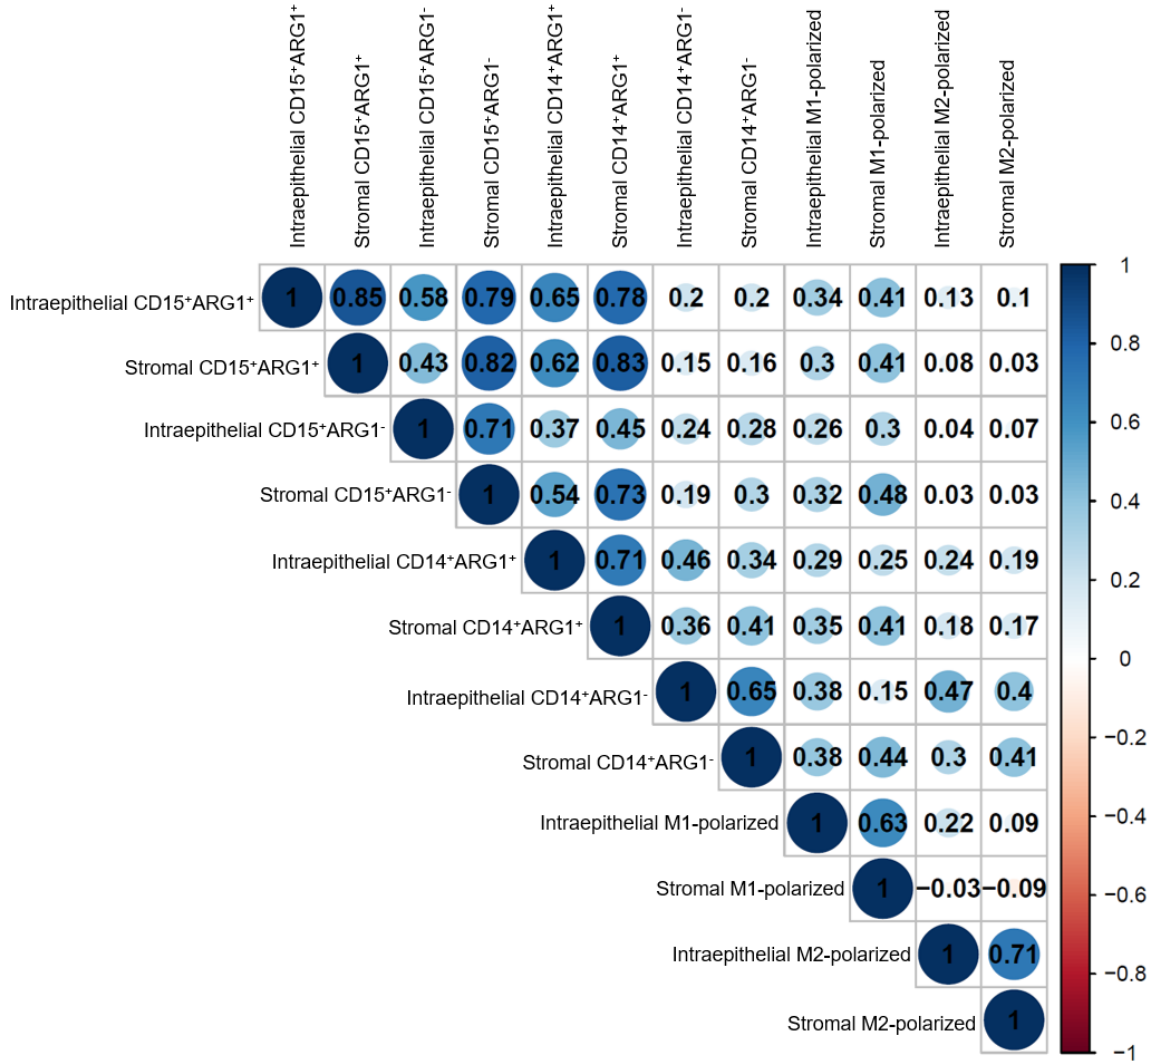

B

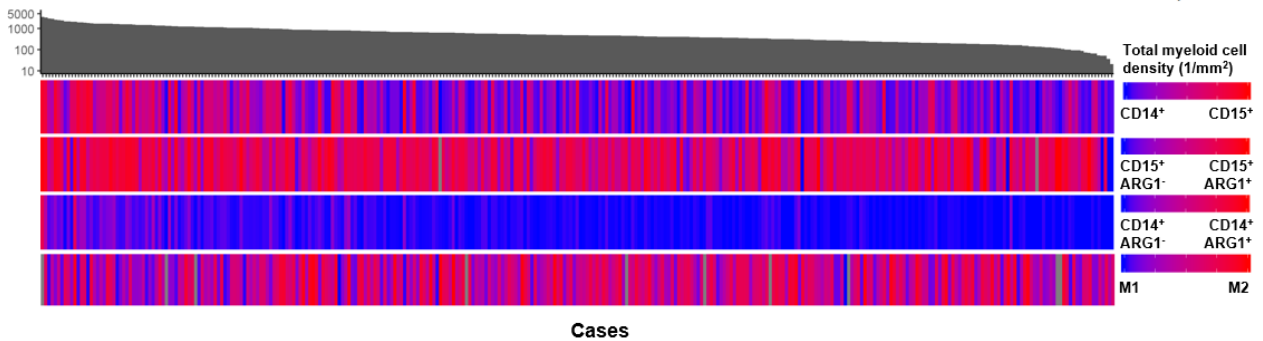

**Supplementary Figure S8. Distribution of myeloid immune cell densities.**

Spearman correlation coefficients of myeloid immune cell densities in tumor intraepithelial and stromal compartments (A). Myeloid cell distributions across the study cohort (n=290) according to decreasing total myeloid cell density (top grey bar plot) (C). The heatmaps display the relative distributions (0-100%) of the specified myeloid cell populations within the parent populations (first row: all CD14<sup>+</sup> or CD15<sup>+</sup> myeloid cells; second row: CD15<sup>+</sup> myeloid cells; third row: CD14<sup>+</sup> myeloid cells; fourth row M1- or M2-polarized macrophages); grey bars indicate missing data. (B).



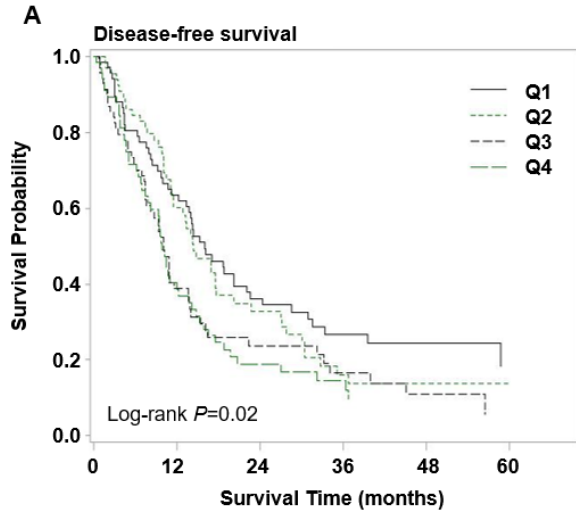

|          |    | Number at Risk (Time, months) |    |    |    |    |  |
|----------|----|-------------------------------|----|----|----|----|--|
| Quartile | 0  | 12                            | 24 | 36 | 48 | 60 |  |
| Q1       | 72 | 41                            | 21 | 12 | 10 | 3  |  |
| Q2       | 71 | 33                            | 16 | 7  | 5  | 4  |  |
| Q3       | 73 | 23                            | 10 | 7  | 4  | 1  |  |
| Q4       | 70 | 22                            | 10 | 6  | 4  | 4  |  |

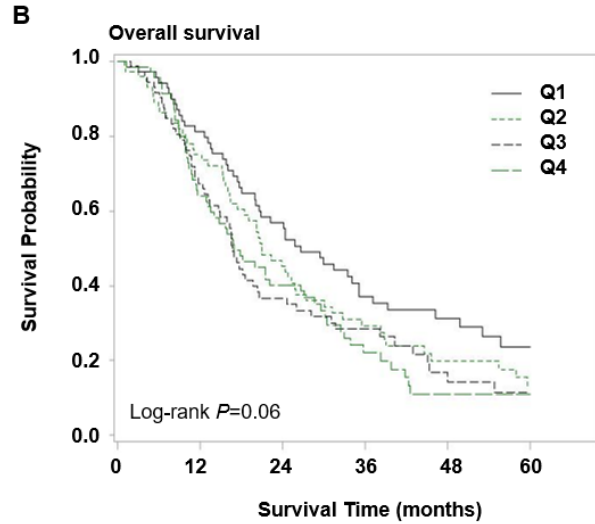

|          |    | Number at Risk (Time, months) |    |    |    |    |  |
|----------|----|-------------------------------|----|----|----|----|--|
| Quartile | 0  | 12                            | 24 | 36 | 48 | 60 |  |
| Q1       | 72 | 55                            | 36 | 20 | 14 | 6  |  |
| Q2       | 73 | 53                            | 29 | 16 | 10 | 5  |  |
| Q3       | 73 | 46                            | 22 | 15 | 6  | 4  |  |
| Q4       | 72 | 44                            | 25 | 11 | 5  | 5  |  |

**Supplementary Figure S9. Kaplan-Meier survival curves for CD15<sup>+</sup>ARG1<sup>+</sup> cell density.**

Kaplan-Meier survival curves for CD15<sup>+</sup>ARG1<sup>+</sup> cell density for disease-free survival (A) and overall survival (B).  $P$  values were calculated with log-rank test.
